1 **Hypoosmolar dose-dependent swelling occurs in both**  
2 **pyramidal neurons and astrocytes in acute**  
3 **hippocampal slices**

4  
5 **Thomas R. Murphy<sup>1,3</sup>, David Davila<sup>2,3</sup>, Nicholas Cuvelier<sup>2,3</sup>, Leslie R. Young<sup>2,3</sup>, Kelli**  
6 **Lauderdale<sup>1,3</sup>, Devin K. Binder<sup>1,3</sup>, Todd A. Fiacco<sup>2,3\*</sup>**

7 <sup>1</sup>Division of Biomedical Sciences, School of Medicine, University of California,  
8 Riverside, CA 92521, USA

9 <sup>2</sup>Department of Cell Biology and Neuroscience, University of California, Riverside, CA  
10 92521, USA

11 <sup>3</sup>Center for Glial-Neuronal Interactions; University of California, Riverside, CA 92521,  
12 USA

13

14 **\* Correspondence:**

15 Todd A. Fiacco  
16 toddf@ucr.edu

17

18 **Abbreviated Title:** Hypoosmolar swelling of neurons and astrocytes

19

20

21 **Number of words: 8411**

22 **Number of figures: 9**

23

24

25

26 **Keywords:** hypoosmolar, cellular edema, AQP4, neuronal swelling, cell volume.

27

28

29 **Abstract:**

30 Normal nervous system function is critically dependent on the balance of water  
31 and ions in the extracellular space. Pathological reduction in brain interstitial osmolarity  
32 results in osmotically-driven flux of water into cells, causing cellular edema which  
33 reduces the extracellular space and increases neuronal excitability and risk of seizures.  
34 Astrocytes are widely considered to be particularly susceptible to cellular edema due to  
35 selective expression of the water channel aquaporin-4 (AQP4). The apparent resistance  
36 of pyramidal neurons to osmotic swelling has been attributed to lack of functional water  
37 channels. In this study we report rapid volume changes in CA1 pyramidal cells in  
38 hypoosmolar ACSF (hACSF) that are equivalent to volume changes in astrocytes  
39 across a variety of conditions. Astrocyte and neuronal swelling was significant within 1  
40 minute of exposure to 17 or 40% hACSF, was rapidly reversible upon return to  
41 normosmolar ACSF, and repeatable upon re-exposure to hACSF. Neuronal swelling  
42 was not an artifact of patch clamp, occurred deep in tissue, was similar at physiological  
43 vs. room temperature, and occurred in both juvenile and adult hippocampal slices.  
44 Neuronal swelling was neither inhibited by TTX, nor by antagonists of NMDA or AMPA  
45 receptors, suggesting that it was not occurring as a result of excitotoxicity. Surprisingly,  
46 genetic deletion of AQP4 did not inhibit, but rather augmented, astrocyte swelling in  
47 severe hypoosmolar conditions. Taken together, our results indicate that neurons are  
48 not osmoresistant as previously reported, and that osmotic swelling is driven by an  
49 AQP4-independent mechanism.

50

51

## 52 1 Introduction

53 Acute reduction of plasma osmolarity in humans is a medical emergency, often  
54 resulting in seizures and sometimes coma or even death (Andrew 1991; Castilla-Guerra  
55 et al. 2006). Such deleterious effects on the CNS can be attributed to the sudden  
56 change in osmotic pressure within the interstitial space of the brain, which causes cells  
57 to take on water leading to “cellular” or “cytotoxic” edema (Kimelberg 1995). Tissue  
58 swelling resulting from cellular edema has been observed in many studies examining  
59 the effect of hypoosmolar conditions on excitability (Andrew and MacVicar 1994;  
60 Chebabo et al. 1995b; Kilb et al. 2006). Given that cell swelling shrinks the extracellular  
61 space (ECS) and increases tissue resistance, hypoosmolar conditions amplify  
62 nonsynaptic excitability in neurons and increase susceptibility to seizure (Lauderdale et  
63 al. 2015; Roper et al. 1992; Rosen and Andrew 1990; Schwartzkroin et al. 1998).

64 Most cellular edema in the brain is thought to be driven by water influx through  
65 aquaporin-4 (AQP4) channels, which are expressed primarily by astrocytes (Nagelhus  
66 et al. 2004). Knockout of AQP4 inhibits the tissue swelling normally associated with  
67 seizures (Binder et al. 2004), stroke (Katada et al. 2014), and other models of cytotoxic  
68 edema (Papadopoulos and Verkman 2013). In normal physiology, AQP4 is important for  
69 water homeostasis in the brain, and appears to be required for the activity-dependent  
70 fluxes of water which occur alongside potassium uptake and buffering (Amiry-  
71 Moghaddam et al. 2003; Eid et al. 2005; Illarionova et al. 2010; Strohschein et al. 2011).  
72 Astrocytic swelling via AQP4-mediated water uptake is well-established as both a  
73 physiological and pathological phenomenon.

74           Neuronal volume changes, by contrast, are considered to be almost exclusively  
75 pathological. Neuronal somata will rapidly swell in cases of oxygen-glucose deprivation  
76 (OGD) and excitotoxic damage (Andrew et al. 2007; Choi 1992; Liang et al. 2007;  
77 Risher et al. 2009; Rungta et al. 2015), but appear very resilient to hypoosmolar  
78 swelling, an expected consequence of nonfunctional water channels (Andrew et al.  
79 2007; Caspi et al. 2009; Gorelick et al. 2006). This has led to the conclusion that  
80 hypoosmolar conditions selectively swell glial cells (Andrew et al. 2007; Risher et al.  
81 2009). However, this conclusion contradicts earlier reports of swelling under  
82 hypoosmolar stress in isolated neurons in culture (Aitken et al. 1998; Borgdorff et al.  
83 2000; Somjen 1999). Furthermore, studies which have directly examined hypoosmolar  
84 swelling of neurons or astrocytes (Andrew et al. 2007; Hirrlinger et al. 2008; Risher et al.  
85 2009) have lacked temporal resolution below approximately 5 minutes. We have  
86 recently found that neuronal excitability increases significantly within 2 minutes of  
87 exposure to hypoosmolar ACSF (hACSF), suggesting that constriction of the ECS  
88 occurs rapidly during hACSF application (Lauderdale et al. 2015). Determining the  
89 precise contribution of cellular swelling and reduction of the ECS to rapid changes in  
90 neuronal excitability requires an equally rapid measurement of cell volume.

91           In the present study, we used confocal imaging to quantify stratum radiatum (s.r.)  
92 astrocyte and CA1 pyramidal neuron volume in acute mouse hippocampal slices during  
93 repeated 5-7 minute hypoosmolar ACSF (hACSF) applications, at 1-minute resolution.  
94 Surprisingly, we found that CA1 neurons and s.r. astrocytes swell to the same extent  
95 and over a similar time course in both 17% and 40% hACSF. Neuronal swelling  
96 occurred across a variety of experimental conditions, suggesting that it is not an isolated

97 phenomenon or attributable to one particular variable. Neuronal swelling did not differ  
98 between adult and juvenile animals, nor was it prevented by NMDA receptor  
99 antagonists, AMPA/Kainate receptor antagonists, TTX, or AQP4 deletion. Astrocyte  
100 swelling was also unaffected by AQP4 deletion in 17% hACSF and significantly  
101 augmented, rather than inhibited, in 40% hACSF. These data provide evidence that  
102 neurons are not osmoresistant and suggest that neurons and astrocytes may share a  
103 common, AQP4-independent swelling pathway in hypoosmolar conditions.

104

## 105 **2 Methods**

106 All animals and protocols used in the following experiments were approved by the  
107 Institutional Animal Care and Use Committee at the University of California, Riverside.

### 108 **2.1 Slice preparation in juveniles**

109 Hippocampal slices were prepared from juvenile (15-21 day old) C57Bl/6J mice as  
110 previously described (Xie et al. 2014). In some experiments, Thy1-eGFP (Jackson  
111 Laboratories, Bar Harbor, ME) or AQP4<sup>-/-</sup> mice were utilized, both of which were on a  
112 C57Bl/6J background and exhibited no obvious phenotypic or behavioral differences  
113 from wild-type (Feng et al. 2000; Ma et al. 1997). Animals were deeply anesthetized  
114 under isoflurane and decapitated, and brains were quickly moved into ice-cold “slicing  
115 buffer” containing (in mM): 125 NaCl, 2.5 KCl, 3.8 MgCl<sub>2</sub>, 1.25 NaH<sub>2</sub>PO<sub>4</sub>, 26 NaHCO<sub>3</sub>,  
116 25 glucose, and 1.3 ascorbic acid, bubbled continuously with carbogen (95% O<sub>2</sub>/5%  
117 CO<sub>2</sub>). Parasagittal hippocampal slices (350 μm thick) were prepared using a Leica  
118 VT1200S vibratome (Leica, Nussloch, Germany) and transferred to a recovery chamber

119 containing standard artificial cerebrospinal fluid (ACSF), which was composed of (in  
120 mM): 125 mM NaCl, 2.5 KCl, 2.5 CaCl<sub>2</sub>, 1.3 mM MgCl<sub>2</sub>, 1.25 NaH<sub>2</sub>PO<sub>4</sub>, 26 NaHCO<sub>3</sub>,  
121 and 15 glucose, bubbled continuously with carbogen (~299-303 mOsm). Slices were  
122 incubated in ACSF at 36° C for 45 minutes, then allowed to cool to room temperature for  
123 a minimum of 15 minutes before being transferred to a recording chamber for  
124 experiments.

125 In some cases, sulforhodamine-101 (SR-101; Sigma-Aldrich, St. Louis, MO) was  
126 used during incubation to selectively stain astrocytes (Schnell et al. 2015). Incubation  
127 was adjusted as follows (Xie et al. 2014): After preparation, slices were transferred to a  
128 recovery chamber containing 1 μM SR-101, dissolved in a modified ACSF composed of  
129 (in mM): 125 NaCl, 2.5 KCl, 0.5 CaCl<sub>2</sub>, 6 MgCl<sub>2</sub>, 1.25 NaH<sub>2</sub>PO<sub>4</sub>, 26 NaHCO<sub>3</sub>, 15  
130 glucose and 1.3 ascorbic acid, bubbled continuously with carbogen, and incubated at  
131 36° C for 25-35 minutes. Slices were subsequently transferred to the same modified  
132 ACSF without SR-101 for 10 more minutes at 36° C. Finally, slices were allowed to cool  
133 to room temperature for 15 minutes before being transferred to ACSF. Slices were  
134 equilibrated in ACSF for at least 15 minutes prior to use. For experiments performed at  
135 physiological temperature, slices were kept at 36° C.

## 136 **2.2 Slice preparation in adults**

137 Adult (10-15 week old) hippocampal slices were prepared from C57Bl/6J or Thy1-  
138 eGFP mice as previously described (Lauderdale et al. 2015). Adult slicing buffer (ASB)  
139 contained (in mM): 87 NaCl, 75 sucrose, 2.5 KCl, 0.5 CaCl<sub>2</sub>, 7 MgCl<sub>2</sub>, 1.25 NaH<sub>2</sub>PO<sub>4</sub>, 25  
140 NaHCO<sub>3</sub>, 10 glucose, 1.3 ascorbic acid, 2 pyruvate, 3.5 MOPS, and 100 μM kynurenic  
141 acid, bubbled continuously with carbogen, and was partially frozen to form an icy

142 “slush”. Slices were prepared as described above, and transferred to a recovery  
143 chamber containing carbogen-bubbled ASB at 36° C for 45 minutes. Following  
144 incubation, slices were allowed to cool to room temperature for 15 minutes before being  
145 transferred to standard ACSF, where they equilibrated for a minimum of 20 minutes  
146 before being used for experiments.

147 The SR-101 protocol was adapted for use in adults by adding SR-101 to the ASB  
148 which was similar in composition to the modified ACSF normally used for SR-101  
149 loading. For unknown reasons, adult astrocytes proved far more resistant to SR-101  
150 loading than did juvenile astrocytes, and required additional modifications to our labeling  
151 protocol. We found that a 45-minute incubation in 2-4  $\mu$ M SR-101 labeled adult  
152 astrocytes to a similar degree and depth as juvenile astrocytes, with limited background  
153 staining. Slices were cooled to room temperature for 15 minutes in SR-101-free ASB  
154 after incubation, and then transferred to standard ACSF as above.

### 155 **2.3 Solutions and drugs**

156 “Normosmolar ACSF” (nACSF, ~298 mOsm), consisting of standard ACSF without  
157  $MgCl_2$ , was used for baseline recordings and wash periods. Seventeen or 40%  
158 “hyposmolar ACSF” (hACSF) was prepared by using deionized water to dilute nACSF  
159 by 10% (final osmolarity: ~270 mOsm), 17% (final osmolarity: ~250 mOsm) or 40%  
160 (final osmolarity: ~180 mOsm). These percent reductions in osmolarity have been  
161 generally described as “mild” to “modest” (< 20% hyposmolarity) (Anderova et al.  
162 2014; Azouz et al. 1997; Thrane et al. 2011) or “moderate” to “severe” (> 30%  
163 hyposmolarity) (Anderova et al. 2014; Kimelberg 2004; Kimelberg et al. 2006), and  
164 were chosen based on those often used in previous studies which have ranged

165 anywhere from 5% to 65% (Andrew et al. 2007; Chebabo et al. 1995b; Darby et al.  
166 2003; Fiacco et al. 2007; Haskew-Layton et al. 2008; Hirrlinger et al. 2008; Kilb et al.  
167 2006; Kimelberg 2004; Lauderdale et al. 2015; Thrane et al. 2011; Wurm et al. 2010).  
168 Unless otherwise indicated, “experimental” ACSF solutions (nACSF and hACSF)  
169 contained 1  $\mu\text{M}$  TTX (Cayman Chemical, Ann Arbor, MI) to block voltage-gated  $\text{Na}^+$   
170 channels, and 10  $\mu\text{M}$  NBQX (Alomone Labs, Jerusalem, Israel) to block AMPA/Kainate  
171 receptors (Lauderdale et al. 2015). In some experiments, 50  $\mu\text{M}$  AP5 (an NMDA-  
172 receptor antagonist; Abcam, Cambridge, MA) or 6 mM  $\text{Mg}^{2+}$  (to maximize block of  
173 NMDA receptors in the slice; Dissing-Olesen et al. 2014) were also added to the  
174 experimental solutions.

175 A number of experiments were performed using more “physiological” antagonist-  
176 free solutions, which were based on standard (1.3 mM  $\text{Mg}^{2+}$ ) ACSF and contained no  
177 TTX or NBQX. In these experiments, standard ACSF was used in place of nACSF for  
178 baseline and wash periods, and diluted by 17% or 40% to generate the respective  
179 hACSF doses.

## 180 **2.4 Patch-clamp of neurons and astrocytes**

181 Hippocampal slices were transferred to a recording chamber and continuously  
182 superfused with room-temperature, oxygenated ACSF. For experiments at physiological  
183 temperature, recording chamber and perfusion solution temperatures were maintained  
184 at 36°C using a Warner Instruments TC-344B Dual Channel Heater Controller (Warner  
185 Instruments, Hamden, CT). Slices were visualized using an Olympus BX61 WI upright  
186 microscope equipped with UMPLFLN 10x (N.A. 0.3) and LUMPlanFI 60x (N.A. 0.9)  
187 water-immersion objectives and DIC optics (Olympus America, Center Valley, PA). CA1



188 pyramidal neurons and passive stratum radiatum (s.r.) astrocytes were patch clamped  
189 in order to load them with fluorescent indicator dyes for volume measurements in our  
190 initial experiments. Whole-cell patch clamp was performed using a Multiclamp 700B  
191 amplifier and Digidata 1550 digitizer, controlled through pClamp v.10.4 and Multiclamp  
192 commander software (Molecular Devices, Sunnyvale, CA). Patch pipettes were pulled  
193 from borosilicate glass using a Narishige PC-10 vertical micropipette puller (Narishige,  
194 Tokyo, Japan). Neuronal patch pipettes had a resistance of 3.8-5.3 M $\Omega$  when filled with  
195 an internal solution containing (in mM): 140 K-gluconate, 4 MgCl<sub>2</sub>, 0.4 EGTA, 4 Mg-  
196 ATP, 0.2 Na-GTP, 10 HEPES, and 10 phosphocreatine, pH 7.3 with KOH. For dye  
197 loading, neuronal patch pipettes also contained the fluorophores Alexa 488 hydrazide  
198 (100-200  $\mu$ M) or Alexa 594 hydrazide (200  $\mu$ M; Thermo Fisher Scientific, Waltham, MA).  
199 Astrocyte patch pipettes had resistances of 4.2-8.9 M $\Omega$  when filled with an internal  
200 solution containing (in mM): 130 K-gluconate, 4 MgCl<sub>2</sub>, 10 HEPES, 10 glucose, 1.185  
201 Mg-ATP, 10.55 phosphocreatine, and 0.1315 mg/ml creatine phosphokinase, pH 7.3 by  
202 KOH. Astrocyte pipettes also contained Alexa Fluor 488 dextran or Oregon Green 488  
203 dextran (Thermo Fisher Scientific), both 10 kDa in size to prevent dye spread into  
204 neighboring astrocytes via gap junctions.

205       Neurons and astrocytes were identified first by location and morphology under DIC  
206 optics, and confirmed by their electrophysiological properties. Pyramidal neuron resting  
207  $V_m$  was  $-60.1 \pm 0.7$  mV ( $n = 30$ ) and exhibited characteristic voltage-gated Na<sup>+</sup> and K<sup>+</sup>  
208 currents in response to a voltage step protocol. Astrocytes were identified as “passive” if  
209 they exhibited a characteristically low input resistance, low resting membrane potential  
210 ( $-78.0 \pm 1.2$  mV;  $n = 15$ ) and lack of voltage-gated conductances. Astrocytes and

211 neurons were voltage-clamped to -90 or -70 mV, respectively, for no more than 5  
212 minutes to allow for dye diffusion into the cytoplasm (with rare exceptions for dextran-  
213 loading of astrocytes, which sometimes required up to 8 minutes). In the interest of  
214 limiting the amount of cytoplasm dialyzed by the internal solution, this time was kept to a  
215 minimum with occasional, quick confocal scans to check cell brightness. Once dye  
216 loading was deemed sufficient for imaging, the pipette was gently withdrawn. A smooth,  
217 stable “off-cell” and formation of a  $> 1\text{G}\Omega$  seal during pipette removal was considered  
218 an indicator that the cell was not damaged during withdrawal of the patch pipette. All  
219 patch clamped cells were allowed to recover for at least 10 minutes before further use.  
220 In later experiments, patch clamp was mostly supplanted by bulk loading astrocytes with  
221 SR-101 dye (see above), and by using neurons from the Tg(Thy1-EGFP)MJrs/J (Thy1-  
222 GFP-M, stock #7788) or B6;CBA-Tg(Thy1-EGFP)SJrs/NdivJ (Thy1-GFP-S, stock  
223 #11070) mouse lines, which express eGFP under the neuronal Thy1 promoter in some  
224 pyramidal neuron populations (Feng et al. 2000). In these instances, cells were chosen  
225 based on their depth in the tissue, lack of obvious morphological abnormalities, and  
226 their visibility under our standard imaging settings (see below).

## 227 **2.5 Confocal imaging settings and experimental design**

228 Alexa Fluor 488 dextran, Oregon green 488 dextran, Alexa Fluor 488, and eGFP  
229 were excited using a 488 nm argon laser (Melles Griot, Carlsbad, CA) and detected with  
230 a 503-548 nm bandpass filter, controlled by Olympus Fluoview 1000 software. Laser  
231 power was generally held at  $\leq 2.0\%$ , well below the level needed to induce  
232 photobleaching ( $> 50\%$ ). Pixel dwell time was 8  $\mu\text{s}$ /pixel for astrocytes (which often  
233 required extra exposure time due to limited dextran loading) and 4  $\mu\text{s}$ /pixel for neurons.

234 Alexa Fluor 594 and SR-101 were excited using a 559 nm semiconductor laser and  
235 detected using a 624-724 nm bandpass filter. Pixel dwell times were kept the same as  
236 above for consistency. Laser power  $\leq 1.5\%$  was sufficient to detect SR-101 labeled  
237 astrocytes and Alexa Fluor 594 labeled neurons. To strike an appropriate balance  
238 between image resolution and brightness, confocal aperture size was set to 300  $\mu\text{m}$  and  
239 PMT voltage  $\sim 830$  V across all experiments.

240 In one experiment, Thy1-eGFP neurons were examined much deeper within the  
241 slice ( $>60$   $\mu\text{m}$  below slice surface) and were in many cases impossible to image using  
242 our standard settings. Instead, laser power was increased to 10% and pixel dwell time  
243 to 8  $\mu\text{s}/\text{pixel}$ , increasing acquisition time per image stack ( $\sim 15$ -30 seconds) but  
244 significantly boosting cell visibility. We observed no deleterious effects on cell health  
245 resulting from the increase in laser power or exposure time.

246 All experiments started in standard ACSF. Where applicable, standard ACSF was  
247 replaced by nACSF following patch pipette removal or identification of the cell to be  
248 imaged, and allowed to wash in for 10 minutes prior to imaging. Imaging consisted of  
249 confocal z-stacks taken through the cell soma, beginning with a single “baseline” stack.  
250 As observed by other groups (Hirrlinger et al. 2008; Risher et al. 2009), we found that  
251 single images were insufficient for gathering the full extent of the cell body in the x-y  
252 plane (which is necessary for soma area measurements, our proxy for cell volume), and  
253 were particularly vulnerable to swelling-induced z-shifts across time points. We instead  
254 opted for rapid z-stacks through the soma, at 1.0  $\mu\text{m}$  intervals and a zoom level of 3.5x  
255 (0.118  $\mu\text{m}/\text{pixel}$ ). X, Y and Z-shifts were compensated using quick confocal scans to  
256 check cell position, and adjusting X-Y position and Z-scan upper/lower limits accordingly

257 before acquiring each stack. To increase scan speed, the “clip scan” function was used  
258 to crop the scan window close around the soma, reducing acquisition time to ~15  
259 seconds per stack. These settings allowed us to obtain full z-stacks through the cell  
260 soma at 1-minute intervals. For simplicity, a z-stack encompassing the cell soma will  
261 hereafter be referred to as a “stack”.

262 After a baseline stack was obtained, hACSF was applied for 5 minutes and a  
263 single stack was acquired at the end of each minute. HACSf was then “washed out” by  
264 re-application of normosmolar ACSF (either nACSF or standard ACSF) for 5 minutes, at  
265 the end of which an additional stack was acquired. This sequence was repeated an  
266 additional 2 times to determine repeatability of effects on cell volume. Each subsequent  
267 hACSF application and wash period was lengthened by 1 minute (after which an  
268 additional stack was acquired), due to our observations (unpublished) that neuronal  
269 slow inward currents (SICs) evoked in these conditions were more “spread out” during  
270 subsequent hACSF applications.

## 271 **2.6 Volume analysis protocol**

272 Analysis of neuron and astrocyte volume was performed using the FIJI distribution  
273 of ImageJ as previously described (Lauderdale et al. 2015; Schindelin et al. 2012). Our  
274 basic analysis protocol is depicted in Figure 1. First, z-shifts across time points were  
275 corrected by choosing a common landmark and matching its slice number across all  
276 stacks. Stacks were then concatenated into an x-y-z-t hyperstack (Figure 1B), and  
277 filtered to remove noise (median filter, 2 pixel diameter). A max-intensity z-projection  
278 (MIP) was made through this hyperstack, producing a 2D time series (Figure 1C), in  
279 which each frame was a MIP showing the full x-y extent of the soma at a given time

280 point. X-Y shifts over time were corrected using the “Linear Stack Alignment with SIFT”  
281 plugin (followed by cropping, to remove the blank areas left by image alignment), and  
282 background subtraction was performed using FIJI’s background subtraction tool (radius  
283 50 pixels, sliding paraboloid method). The resultant time series (Figure 1D) was then  
284 binarized using the “mean” thresholding algorithm (Figure 1E) and an elliptical ROI was  
285 drawn to narrowly encompass the soma across all time points in the series (dashed red  
286 circle, Figure 1E). Area above threshold within this ROI (a measure of soma area) was  
287 used as a proxy for soma volume. Volume changes at a given time point are reported  
288 as percent change from baseline soma volume. Some experiments also include the  
289 “average percent change” from baseline over 3 hACSF applications. In these cases,  
290 percent change in the 2<sup>nd</sup> and 3<sup>rd</sup> hACSF periods is calculated based on the preceding  
291 nACSF wash instead of the original baseline, providing a more accurate measure of  
292 acute, relative volume changes during hACSF application. Representative images,  
293 unless otherwise noted, depict the thresholded images used for analysis.

294 In an effort to better analyze neurons from “deep” tissue (which were not amenable  
295 to our standard analysis protocol due to poor resolution of cell borders), we employed a  
296 simplified version of the microspectrofluorimetric method of measuring volume (Crowe  
297 et al. 1995). This method does not rely on cell borders but rather on fluorescence  
298 intensity, allowing for estimation of cell volume changes using a region of interest (ROI)  
299 placed in the cell center. In brief, this method assumes a fixed number of fluorescent  
300 molecules within a cell, and therefore that any changes in cell water content (i.e. cell  
301 swelling or shrinking) will alter their concentration. As dye becomes less concentrated,  
302 fluorescence ( $F$ ) should decrease linearly, and vice versa. Cell volume changes are

303 thus inversely related to changes in cell fluorescence ( $\frac{F_t}{F_0}$ ), where  $F_t$  = cell fluorescence  
304 at the time point of interest and  $F_0$  = baseline cell fluorescence), and can be roughly  
305 calculated as the inverse of the fluorescence ratio ( $\frac{F_0}{F_t}$ ). Fluorescence ratios were  
306 determined by drawing an ROI 5  $\mu\text{m}$  x 5  $\mu\text{m}$  wide over the center of a given cell in a  
307 processed MIP time series stack (just prior to thresholding) and measuring average  
308 intensity in this region at each time point.

## 309 **2.7 Statistical Analysis**

310 Statistical analysis was performed with SPSS Statistics 22 or 23 software (IBM  
311 Corporation, Armonk, NY). Mixed-design ANOVA was used for all tests to determine  
312 changes from baseline over time (within-subject factor) and between treatments,  
313 genotypes or cell types (between-subject factor). Outliers were in rare cases excluded  
314 from analysis, and only one outlier was removed from any particular group. A cell  
315 identified as an outlier was considered for removal only if: (a) its removal improved the  
316 reliability of ANOVA results (making group N more equal, reducing normality or  
317 homogeneity of variance violations, etc); and (b) measurement errors were clearly  
318 responsible for the aberrant data. Significant within-subject effects were investigated  
319 further by pairwise comparisons of each time point group to baseline. Multiple  
320 comparisons between time points were adjusted performed using the Holm-Bonferroni  
321 method, a stepwise procedure with the same assumptions as the Bonferroni correction  
322 but substantially more power for larger numbers of comparisons. Significant between-  
323 subject effects were further investigated by Student's t-test or (if 3 or more groups)  
324 using pairwise comparisons with Bonferroni correction. Significant interactions were

325 investigated in two steps. First, between-group simple effects were tested at each time  
326 point using Student's t-test (for 2 groups) or one-way ANOVA followed by Tukey's HSD  
327 post-hoc tests (for 3 or more groups). In the case of normality or homoscedasticity  
328 violations, appropriate alternatives were chosen (e.g. Welch t-test or Mann-Whitney U).  
329 Second, within-subjects simple effects were determined by splitting the file by group and  
330 running each as an individual one-way repeated measures ANOVA, with Holm-  
331 Bonferroni post-hoc tests as above. This "split-file" method has the effect of splitting the  
332 error terms by group and was deemed to be more accurate than obtaining simple main  
333 effects within the original mixed ANOVA, as the latter uses a pooled error in its  
334 calculations. N = 7-10 cells per group (after outlier removal) for all experiments, unless  
335 indicated otherwise. Significant differences are reported at the  $p < 0.05$  (\*),  $p < 0.01$  (\*\*),  
336 and  $p < 0.001$  (\*\*\*) levels.

337

### 338 **3 Results**

339 In a previous study, we found heightened neuronal excitability within one minute of  
340 exposing hippocampal slices to 17% or 40% hypoosmolar ACSF (Lauderdale et al.  
341 2015). The primary focus of the current study was to examine the volume changes  
342 exhibited by neural cells over this time period. While it has been reported that  
343 hypoosmolar volume changes are mainly limited to astrocytes (Andrew et al. 2007;  
344 Caspi et al. 2009; Risher et al. 2009), conflicting reports suggest this may not always be  
345 the case (Aitken et al. 1998; Borgdorff et al. 2000; Boss et al. 2013). Therefore, we  
346 chose to examine volume responses of stratum radiatum (s.r.) astrocytes as well as  
347 CA1 pyramidal neurons, using hypoosmolar solutions (denoted hACSF for simplicity)

348 made by 17% or 40% dilution of standard ACSF with distilled water, and including TTX  
349 (1  $\mu$ M), NBQX (10  $\mu$ M) and 0 mM  $Mg^{2+}$  by default. These conditions were chosen to  
350 match our previous work demonstrating significant stimulation of NMDA receptor  
351 currents by hACSF in CA1 pyramidal neurons (Lauderdale et al. 2015). The use of TTX  
352 to block neuronal firing also reduced the likelihood of spreading depression, a wave of  
353 depolarization and subsequent synaptic silencing which has sometimes been observed  
354 in hypoosmolar conditions (Chebabo et al. 1995a). Normosmolar ACSF (nACSF), used  
355 during the baseline and wash periods, was not diluted but otherwise identical in  
356 composition to the above.

### 357 **3.1 Astrocytes and neurons swell to approximately equal volumes in** 358 **hypoosmolar ACSF**

359 We first examined the volume responses of CA1 pyramidal neurons and s.r.  
360 astrocytes to repeated applications of 17% and 40% hACSF (Figure 2). Neurons (Figure  
361 2A-D) and astrocytes (Figure 2E, F) were initially labeled by patch-clamp dialysis of the  
362 fluorescent indicators Alexa Fluor 568 hydrazide or fluorescein dextran, respectively,  
363 and imaged using confocal microscopy (see Methods). As in our previous study, image  
364 stacks through cell somata were collected at 1-minute intervals starting with a baseline  
365 in nACSF (Figure 2A1, E1), and proceeding through 5 minutes of hACSF (Figure 2A2,  
366 E2), with a final image stack acquired after a 5 minute "wash" in nACSF (Figure 2A3,  
367 E3). Stacks were post-processed and thresholded (Figure 2B to quantify percent  
368 change from baseline at each time point (Figure 1; also see methods). In contrast to  
369 some previous studies in which neuronal volume was insensitive to hypoosmolar shifts  
370 (Andrew et al. 2007; Caspi et al. 2009), we found that neurons rapidly swelled in



371 response to both 17% and 40% hACSF, and this swelling was similar in magnitude and  
372 time course to volume changes in astrocytes (Figure 2A-D). Neuronal soma area  
373 significantly increased above baseline within 1 minute in 17% ( $2.04 \pm 0.33\%$ ,  $p < 0.001$ )  
374 or 40% ( $2.09 \pm 0.72\%$ ,  $p = 0.044$ ) hACSF, and continued to gradually increase to a  
375 maximum of  $4.72 \pm 0.41\%$  in 17% hACSF and  $10.51 \pm 0.93\%$  in 40% hACSF (Figure  
376 2D). Overlays of baseline and 5 minute 40% hACSF time points (Figure 2C2) facilitate  
377 visualization of these volume increases as magenta expansions along the outer border  
378 of the cell. Neurons largely recovered to baseline volume after a 5 minute wash period  
379 in nACSF ( $1.27 \pm 0.39\%$  above baseline in 17%,  $2.70 \pm 0.92\%$  in 40% hACSF,  $p < 0.05$   
380 each), as shown in Figure 2C3 overlays. These data bore a remarkable similarity to our  
381 observations of s.r. astrocytes in the same conditions (Figure 2E, F). As reported in  
382 Lauderdale et al. (2015), astrocytes also rapidly swelled in both concentrations of  
383 hACSF within the first minute ( $p < 0.01$ ) and in a dose-dependent manner. Unlike  
384 neurons, astrocytes fully recovered to baseline volume upon return to nACSF for 5  
385 minutes.

386 Swelling of both neurons and astrocytes was repeatable upon additional  
387 applications of 40% or 17% hACSF (Figure 2G). No neuronal swelling was detected in  
388 the absence of hACSF (Figure 2G;  $n = 6$ ). No significant interaction was found between  
389 cell type and time point (40% hACSF,  $F(2.66,34.64) = 1.12$ ,  $p = 0.351$ ; 17% hACSF,  
390  $F(4.11,65.73) = 1.12$ ,  $p = 0.355$ ), suggesting largely identical swelling characteristics  
391 between the two cell types.

### 392 **3.2 Neuronal health is unlikely to be a contributing factor to hACSF-induced** 393 **swelling**

394 We began to examine the key differences in experimental protocol between our  
395 study and previous work, to determine if an unforeseen factor was responsible for (or  
396 contributing to) the neuronal swelling observed in our conditions.

397 Although we had no reason to suspect damage to the cell using whole-cell patch clamp  
398 approaches (see Methods), we considered the possibility that the simple act of patch  
399 clamping neurons may make them more susceptible to hACSF-induced swelling. We  
400 tested this by using hippocampal slices from transgenic Thy1-eGFP mice (Feng et al.  
401 2000). These mice express enhanced green fluorescent protein (eGFP) in a sparse,  
402 random population of pyramidal neurons (Figure 3A), making them ideal for isolating a  
403 single neuron in the densely packed pyramidal layer of the hippocampal CA1 region  
404 (Andrew et al. 2007). Neurons expressing eGFP were bright and easily identified at our  
405 standard imaging depth of 30-40  $\mu\text{m}$  (Figure 3B1, left) and once again exhibited distinct  
406 volume changes upon exposure to 40% hACSF (Figure 3B2, right). Compared to patch-  
407 loaded neurons, Thy1-eGFP neurons at this depth showed no significant difference in  
408 swelling responses to 40% hACSF ( $F(1,16) = 0.98$ ,  $p = 0.336$ ; Figure 3C) or 17%  
409 hACSF ( $F(1,16) = 1.36$ ,  $p = 0.26$ ; data not shown).

410 With a moderate increase in laser power (10% of maximum), we were able to  
411 extend our imaging range to ~65-90  $\mu\text{m}$  below the slice surface (Figure 4A1),  
412 considerably deeper than what was feasible by patch clamp. Deeper neurons initially  
413 appeared to be more resistant to volume change in 40% hACSF (Figure 4B), with an  
414 average relative increase of only  $4.22 \pm 0.39\%$  after 5 minutes in hACSF (Figure 4B,  
415 inset). This apparent reduction in osmosensitivity, however, was most likely a detection  
416 issue. Resolution of the boundary of these cells was poor, which tended to be

417 exacerbated by the thresholding step of our analysis. For shallower neurons, both the  
418 original image (Figure 4C1) and its thresholded version (indicated by magenta outlines  
419 on Figure 4C1) tended to reflect similar cell borders. By contrast, much of the visible cell  
420 border in deeper neurons fell below threshold, and the final thresholded image did not  
421 fully represent the cell boundary (Figure 4C2). As the differences in cell volume are  
422 reflected in expansion of the cell borders, such thresholding problems would likely result  
423 in underreporting of increases in cell volume and may explain the apparent reduction in  
424 volume change by deeper neurons.

425 In further support of this view, we observed that both shallow (Figure 4D) and  
426 deeper neurons (Figure 4E) consistently exhibited a visible, generally similar dimming of  
427 eGFP fluorescence during 40% hACSF application (compare average intensity change  
428 between (D) and (E)). This was a strong indicator that neurons at both depths were  
429 swelling to similar degrees, as demonstrated by the microspectrofluorimetric method of  
430 volume analysis used by Crowe and colleagues (Crowe et al. 1995). Broadly speaking,  
431 if intracellular dye content is constant (as can be assumed for eGFP molecules in a  
432 typical cell), then changes in intracellular water will alter dye concentration, which can  
433 be detected via changes in fluorescence intensity. Changes in fluorescence intensity  
434 ( $\frac{F_t}{F_0}$ , where  $F_0$  is baseline fluorescence and  $F_t$  the fluorescence at a given time point)  
435 are inversely proportional to changes in cell volume (Crowe et al. 1995). We reasoned  
436 that this method should be much less sensitive to detection problems than our  
437 thresholding technique (magenta outlines, Figure 4D,E), since it would not be affected  
438 by the ability to resolve the cell boundary. To quantify the eGFP intensity shift, we used  
439 the pre-thresholding MIP time series for each cell (see Methods) to examine the

440 intensity values of a 5x5  $\mu\text{m}$  region near the center of the cell (Yellow boxes, Figure  
441 4D,E). Taking the reciprocal of the fluorescence ratio  $\left(\frac{F_0}{F_t}\right)$ , we calculated a volume  
442 increase in deep neurons of over 20% by 5 minutes in 40% hACSF ( $123 \pm 5.36\%$  of  
443 baseline,  $n = 8$  cells; Figure 4F). Performing a similar measurement on neurons at our  
444 standard imaging depth (with the exception of two neurons in which eGFP was  
445 saturated and no  $F_0/F_t$  ratio could be obtained), we calculated a volume change nearly  
446 identical to that calculated in deep neurons ( $121 \pm 3.14\%$  of baseline). It should be  
447 noted that although the  $F_0/F_t$  method of volume analysis has been previously used in  
448 slices (Risher et al. 2009), its accuracy in culture is much better established (Benfenati  
449 et al. 2011; Tuz et al. 2001), and the percentages calculated above should be  
450 considered only rough approximations of the true volume change. These data do,  
451 however, provide supportive evidence that *relative* volume changes in neurons exposed  
452 to 40% hACSF are independent of depth within the slice.

453 We also compared patch clamp-loaded astrocytes against those loaded with  
454 sulforhodamine-101 (SR-101), a dye selectively taken up by astrocytes in the  
455 hippocampus (Schnell et al. 2012). SR-101-labeled astrocytes did not differ from patch-  
456 clamped astrocytes in their volume increase during 40% hACSF application (SR-101,  $n$   
457 = 10; Patched,  $n = 7$ ;  $p = 0.401$ ; data not shown), although with repeated applications of  
458 hACSF they did appear to swell more than Thy1-eGFP neurons in the same conditions  
459 (in contrast with patch clamped astrocytes and neurons, which had shown no difference  
460 at either dose of hACSF). This effect was attributed largely to a slightly slower return to  
461 baseline in SR-101-labeled astrocytes, which caused a gradual “build up” of astrocyte  
462 volume despite no change in average rate or degree of swelling. These tests overall

463 provided clear evidence that neuronal swelling was not an artifact of neuronal damage  
464 due to whole-cell dialysis with fluorescent indicator, nor was it likely a result of the depth  
465 at which neurons resided in the tissue.

### 466 **3.3 Neuronal swelling is not due to activation of AMPA receptors or action** 467 **potential-mediated synaptic transmission**

468 Having ruled out the possibility that neuronal swelling was an artifact of patch  
469 clamp, we next considered the specific composition of our solutions as a possible  
470 contributor. Until this point, neuronal swelling had been observed in our standard  
471 hACSF, which contained 0 mM  $Mg^{2+}$ , 1  $\mu$ M TTX and 10  $\mu$ M NBQX. These conditions  
472 are ideal for isolating NMDA receptor-dependent SICs (Lauderdale et al. 2015), but are  
473 otherwise quite non-physiological. To determine if the composition of our hACSF was  
474 contributing to the observed neuronal swelling, we prepared “antagonist-free” hACSF  
475 solutions diluted directly from our standard ACSF (see Methods). Despite the removal of  
476 antagonists and partial restoration of  $Mg^{2+}$ , we continued to observe neuronal swelling  
477 across multiple doses of this more “physiological” hACSF (Figure 5A-C). Neuronal  
478 swelling was partially dose-dependent (Figure 5D), differing significantly between 17%  
479 and 40% hACSF ( $p = 0.005$ ), but not between 10% and 17% hACSF ( $p = 0.935$ ). These  
480 results provide evidence that neuronal swelling is a direct result of reduced osmolarity  
481 rather than an artifact of any particular pharmacological reagent.

482 Cellular volume changes and volume regulation can be augmented by higher  
483 temperatures (Andrew et al. 1999; Andrew et al. 1997). Therefore, neuronal volume  
484 changes might be negligible at physiological temperature due to more efficient volume  
485 regulatory mechanisms. To test this possibility, we performed experiments at

486 physiological temperature (~36° C). Neuronal swelling persisted in antagonist-free  
487 hACSF at physiological temperature (Figure 5E), and in fact there was no significant  
488 difference in neuronal swelling between 22° C and 36° C for either 17% hACSF ( $F(1,13)$   
489 = 0.002,  $p = 0.967$ ) or 40% hACSF doses ( $F(1,15) = 1.521$ ,  $p = 0.236$ ; Figure 5F).  
490 These results strongly argue against a contribution of temperature to the observed  
491 neuronal swelling.

### 492 **3.4 Swelling profiles of layer V cortical pyramidal neurons differ from those of** 493 **CA1 pyramidal neurons**

494 Recent studies suggest considerable heterogeneity among neurons and  
495 astrocytes in different cortical regions, and previous work has indicated that cortical  
496 pyramidal neurons (Andrew et al, 2007), but not astrocytes (Risher et al, 2009) may be  
497 osmoresistant. To explore the possibility that swelling profiles of astrocytes and neurons  
498 are region-specific, we also measured volume changes in pyramidal neurons from  
499 neocortical layer V and passive astrocytes from layer II/III (Figure 6). We found eGFP  
500 expression to be particularly low in the cortex of Thy1-eGFP mice, which limited their  
501 utility for these experiments. Data were therefore pooled from Thy1-eGFP neurons ( $n =$   
502  $2$ ) and patch-clamped neurons ( $n = 8$ ), and compared to pooled hippocampal neurons  
503 acquired using both techniques ( $n = 9$  Thy1-eGFP,  $n = 10$  patch clamp). As expected  
504 from our observations of hippocampal astrocytes and neurons, cortical layer II/III  
505 astrocytes (Figure 6A) and layer V pyramidal neurons (Figure 6B) both exhibited rapid  
506 volume changes upon exposure to antagonist-free 40% hACSF. Surprisingly, we  
507 observed significantly greater swelling in cortical neurons compared to cortical  
508 astrocytes (Figure 6C). Average percent change over 3 hACSF applications (Figure 6D)

509 in cortical neurons was nearly double that of hippocampal neurons (5 minutes hACSF:  
510 CA1 neurons,  $8 \pm 0.81\%$  increase; Cortical neurons,  $14 \pm 0.98\%$  increase;  $p < 0.001$ ).  
511 The average percent change did not differ between cortical vs. hippocampal astrocytes  
512 ( $F(1,19) = 0.43$ ,  $p = 0.52$ ; Figure 6E). It was not immediately apparent whether the  
513 increase in cortical neuron osmosensitivity reflected an intrinsic difference in membrane  
514 properties, or simply a greater freedom for cell swelling due to the looser packing  
515 density of neurons in the cortex. These data suggest that osmosensitivity of pyramidal  
516 neurons varies by brain region, and importantly, that significant swelling of pyramidal  
517 neurons is not restricted to the hippocampal region.

### 518 **3.5 Neuronal swelling is not due to NMDA receptor activation**

519 In examining alternate explanations for neuronal swelling in hACSF, we next  
520 chose to more closely investigate the possible involvement of NMDA receptor  
521 excitotoxicity. Neuronal swelling is a well-established consequence of excitotoxic NMDA  
522 receptor activation (Choi 1992; Liang et al. 2007; Rothman and Olney 1987; Rungta et  
523 al. 2015), a distinct possibility in our conditions given the lack of  $Mg^{2+}$  in standard  
524 hACSF or 40% reduction of  $Mg^{2+}$  in physiological hACSF. Additionally, we have  
525 previously established that large, NMDA receptor-dependent slow-inward currents  
526 (SICs) occur in hACSF (Fiacco et al. 2007; Lauderdale et al. 2015). While SIC  
527 frequency (Figure 7A) and amplitude (Figure 7B) can vary between multiple hACSF  
528 applications, their rapid appearance during hACSF (Figure 7C) correlates closely with  
529 the rapid time course of neuronal swelling and could indicate a common mechanism. To  
530 determine whether NMDA receptor activation contributes to neuronal swelling in 40%  
531 hACSF, we examined neuronal swelling in our standard hACSF conditions (0 mM  $Mg^{2+}$ ,

532 1  $\mu\text{M}$  TTX and 10  $\mu\text{M}$  NBQX) with the addition of NMDA receptor inhibitors. Despite the  
533 similar circumstances under which SICs and neuronal swelling are observed, we found  
534 that neither the selective NMDA receptor antagonist DL-2-Amino-5-  
535 phosphonopentanoic acid (DL-AP5; 50  $\mu\text{M}$ ), nor 6 mM  $\text{Mg}^{2+}$ , both of which entirely block  
536 NMDA receptor-dependent currents (Dissing-Olesen et al. 2014; Lauderdale et al.  
537 2015), had any effect on neuronal swelling in 40% hACSF ( $F(2,20) = .06$ ,  $p = 0.942$ ;  
538 Figure 7D). These data suggest that neuronal swelling occurs independently of NMDA  
539 receptor activation.

### 540 **3.6 Neuronal and glial swelling occur in tissue from both juvenile and adult mice**

541 We next considered the possibility that neuronal osmosensitivity varied as a  
542 function of age. All of our experiments to this point had been performed in slices from  
543 P15 - P21 juvenile mice. To test the possibility that neuronal swelling was an age-  
544 dependent effect, we repeated experiments using adult (10-15 week old) mice (Figure  
545 8). Once again antagonist-free 40% hACSF was prepared, as the inclusion of  $\text{Mg}^{2+}$  and  
546 lack of antagonists provided greater physiological relevance for our results while  
547 enabling direct comparison to results from previous studies (Andrew et al. 2007; Risher  
548 et al. 2009). As we had observed in juveniles, both adult CA1 neurons and s.r.  
549 astrocytes swelled rapidly in response to 40% hACSF application (Figure 8A), and did  
550 not differ significantly in their time courses ( $F(1,17) = 0.61$ ,  $p = 0.447$ ). Comparison of  
551 average percent change between adults and juveniles (Figure 8B, C) revealed no  
552 significant differences in neuronal swelling ( $F(1,16) = 0.09$ ,  $p = 0.773$ ) or astrocyte  
553 swelling ( $F(1,19) = 0.006$ ,  $p = 0.94$ ) between the two age groups. These findings  
554 suggest that neuronal swelling is not a developmental phenomenon.



### 555 **3.7 Hypoosmolar swelling of neurons and astrocytes does not require AQP4**

556 In astrocytes, water permeability is thought to be regulated by the expression and  
557 gating of aquaporin-4 (AQP4) channels (Gunnarson et al. 2008; Nagelhus et al. 2004;  
558 Song and Gunnarson 2012). Functional water channels have not been found in  
559 pyramidal neurons, a proposed reason behind their apparent resistance to osmotic  
560 stress (Andrew et al. 2007; Gorelick et al. 2006). Our observation of neuronal swelling in  
561 all hACSF conditions, however, was clear evidence that the lack of functional  
562 aquaporins was not a limiting factor for cell volume change in neurons, and that water  
563 must be entering through an alternate route. Several of the alternate, AQP4-  
564 independent mechanisms proposed for swelling in astrocytes, including water-  
565 permeable cotransporters and even water flux directly across the cell membrane  
566 (Kimelberg 2005), could also be functional in neurons and contribute to the observed  
567 neuronal swelling in our conditions. If these AQP4-independent mechanisms mediate  
568 the rapid neuronal swelling in our hACSF, it follows that the rapid astrocyte swelling in  
569 our hACSF may also be partially (or fully) independent of AQP4.

570 We therefore examined the acute volume responses of both CA1 pyramidal  
571 neurons and s.r. astrocytes to antagonist-free hACSF, using hippocampal slices from  
572 AQP4<sup>-/-</sup> mice (Figure 9). As foreshadowed by our neuronal data gathered to this point,  
573 astrocytes continued to swell even in the absence of AQP4, implying rapid astrocyte  
574 volume changes occur independently of AQP4 expression (Figure 9A). Surprisingly  
575 however, AQP4<sup>-/-</sup> astrocytes swelled significantly more in 40% hACSF compared to  
576 wild-type, reaching approximately 1.4 times the volume of wild-type astrocytes by the  
577 end of each hACSF application (Figure 9B; AQP4<sup>-/-</sup>, 113.19% ± 0.92%; WT, 109.71% ±

578 0.54%;  $p = 0.005$ ). By contrast, astrocyte swelling did not differ between AQP4<sup>-/-</sup> and  
579 wild-type astrocytes in 17% hACSF ( $F(1,17) = 1.000$ ,  $p = 0.331$ ). We also tested the  
580 effects of AQP4<sup>-/-</sup> on neuronal volume changes in 40% hACSF. Not surprisingly, AQP4  
581 deletion had no effect on neuronal swelling ( $F(1,16) = 0.02$ ,  $p = 0.891$ ; Figure 9C, D).  
582 These data seemed to indicate that AQP4 expression, far from being *required* for  
583 intracellular accumulation of water in astrocytes, may actually play an important role in  
584 *limiting* the degree of swelling during severe hypoosmolar stress. Overall, our results  
585 strongly suggest that water influx resulting from hypoosmolar ACSF application is not  
586 selective to astrocytes, and is not mediated by AQP4.

587

#### 588 **4 Discussion**

589 The major finding in this study is that CA1 pyramidal neurons readily swell in  
590 hypoosmolar conditions, increasing their volume significantly above baseline even  
591 within the first minute of hACSF application. The rate and overall amount of neuronal  
592 swelling was found to be almost identical to that observed in stratum radiatum  
593 astrocytes, and was observed repeatedly across a variety of experimental conditions.  
594 Neuronal swelling was rapidly reversible, returning to baseline after 5-7 minutes in  
595 normosmolar ACSF, and readily returned upon re-application of hACSF. While the  
596 astrocyte swelling observed is in line with the reportedly high osmosensitivity of  
597 astrocytes and astrocyte-like glial cells (Hirrlinger et al. 2008; Risher et al. 2009), the  
598 neuronal swelling observed contrasts with previous work concluding that neurons  
599 steadfastly retain their volume during osmotic challenge (Andrew et al. 2007; Caspi et  
600 al. 2009). Neither glial nor neuronal swelling was found to require AQP4 expression.

601 These data cast doubt over the commonly-accepted roles of neurons and astrocytes in  
602 brain water regulation.

603 The possibility that neuronal volume changes are extremely sensitive to subtle  
604 differences in methodology was strongly considered and systematically examined in this  
605 study. Initial experiments were performed in tissue slices from juvenile mice at room  
606 temperature, using whole-cell patch clamp to dialyze individual CA1 hippocampal cells  
607 located 30-50  $\mu\text{m}$  from the slice surface with fluorescent dye. These conditions differed  
608 substantially from those of Andrew et al. (2007), the study most widely cited as concrete  
609 evidence of neuronal osmoresistance. For example, Andrew and coworkers performed  
610 experiments at 33-34°C based on a previous observation that slice swelling is  
611 noticeably decreased at higher temperatures (Andrew et al. 1997), a possible indicator  
612 of isovolumetric regulation (IVR) which is characterized by an apparent resistance to  
613 volume change (Franco et al. 2000; Lohr and Grantham 1986; Pasantés-Morales and  
614 Tuz 2006; Tuz et al. 2001). Furthermore, isovolumetric regulation is observed only  
615 during gradual (but not sudden) shifts in osmolarity (Franco et al. 2000; Pasantés-  
616 Morales and Tuz 2006; Tuz et al. 2001). Neurons imaged deeper in tissue would likely  
617 be exposed to more gradual solution exchanges and therefore, more gradual changes  
618 in osmolarity which could reduce the rate of swelling and facilitate IVR. Therefore, to  
619 specifically test the role of these and other variables, additional recordings were  
620 performed in the following conditions: 1) Using Thy 1-eGFP transgenic mice (Andrew et  
621 al. 2007; Feng et al. 2000) to avoid possible cell damage from patch clamp; 2) At  
622 physiological temperature (36°C); 3) In deep tissue (65-90  $\mu\text{m}$ ); 4) In slices from adult  
623 (10-15 week-old) mice; and, 5) In the neocortex. Neuronal swelling was observed

624 across all of these conditions, suggesting that it is a ubiquitous response to reductions  
625 in osmolarity in both juvenile and adult tissue.

626 Using our standard volume analysis protocol, we found that swelling of neurons  
627 located deeper in the tissue (65-90  $\mu\text{m}$ ) was more difficult to observe compared to  
628 superficial neurons. We interpret much of this apparent difference as a loss of image  
629 fidelity rather than a true effect of tissue depth on volume changes. This interpretation is  
630 supported by our observation that changes in cell fluorescence intensity over time  
631 (which are inversely related to changes in cell volume; Crowe et al. 1995) did not  
632 significantly differ between superficial and deep neurons – a strong indication that  
633 neurons at both depths were swelling to similar volumes.

634 It is worth noting that our standard image analysis protocol, although based on  
635 established methods (Hirrlinger et al. 2008; Risher et al. 2009; Risher et al. 2012), was  
636 intentionally conservative and likely underestimates actual changes in cell volume. Cell  
637 soma area was chosen as a proxy for overall volume changes, since direct measures of  
638 cell volume were not feasible for our conditions. Assuming that cell volume is changing  
639 equally in all directions, it can be inferred that our measurements reflect only about two-  
640 thirds of the true change in volume. This inference is partially supported by the analysis  
641 of fluorescence intensity as an indication of cell volume changes, which suggested  
642 volume increases  $> 1.5$  times those calculated from thresholded images. We also  
643 observed that the precise method of image processing had a surprisingly strong impact  
644 on measured volume. The overall magnitude of volume change observed could often be  
645 increased twofold or more simply through the use of different thresholding methods.  
646 These apparent increases in signal-to-noise ratio often came at the expense of “cell”

647 and “background” pixels being incorrectly classified, and the thresholded images  
648 inconsistent with what could be observed “by eye” pre-thresholding (unpublished  
649 observations). We therefore rejected these methods in favor of the more conservative  
650 “mean” thresholding method, which more consistently returned an image in which the  
651 cell body could be clearly identified.

652 One of the more exciting findings in the present study was a lack of evidence for  
653 AQP4-mediated water *influx* into astrocytes or neurons exposed to hACSF. While not  
654 necessarily surprising for neurons, which do not express AQP4 (Nielsen et al. 1997),  
655 lack of inhibition of astrocyte swelling in AQP4<sup>-/-</sup> mouse tissue was rather unexpected  
656 based on a large body of literature on the requirement of AQP4 for facilitated water  
657 movement across the astrocyte membrane. Surprisingly, not only was AQP4 not  
658 required for astrocyte swelling, but astrocyte volume in severely (40%) hypoosmolar  
659 conditions was significantly greater in AQP4<sup>-/-</sup> mice compared to wild-type animals.  
660 There are a couple of potential explanations for this finding.

661 First, AQP4<sup>-/-</sup> animals have been shown to have a nearly 30% larger resting brain  
662 extracellular space compared to wild-type animals (Binder et al. 2004; Yao et al. 2008).  
663 It is possible that the enlarged ECS in AQP4<sup>-/-</sup> mice provides more available space for  
664 astrocytes to swell into, leading to increased astrocyte swelling. This explanation,  
665 however, fails to account for the lack of increased neuronal swelling in AQP4<sup>-/-</sup> mice,  
666 since neurons would presumably also be adjacent to increased extracellular space. It is  
667 also unlikely that astrocyte volume changes in our 40% hACSF were limited by the  
668 extracellular space in wild-type animals, as tissue continues to swell in far more severe  
669 hypoosmolar conditions (Chebabo et al. 1995b).

670           A second explanation is that AQP4 can provide an efficient efflux pathway for  
671 water to leave astrocytes. AQP4 expression is polarized, with highest levels of  
672 expression in perivascular endfeet (Nielsen et al. 1997). Loss of AQP4 at endfeet has  
673 been proposed to inhibit water removal from the astrocyte, leading to increased swelling  
674 (Wetherington et al. 2008) and impairing tissue recovery from vasogenic edema  
675 (Papadopoulos et al. 2004). Recent work demonstrates AQP4-dependent water efflux  
676 may also be important physiologically. Haj-Yasein and colleagues observed that  
677 Schaffer collateral stimulation in AQP4<sup>-/-</sup> hippocampal slices resulted in a greater ECS  
678 reduction (indicating increased cell swelling), and higher peak  $[K^+]_o$  compared to slices  
679 from wild-type mice (Haj-Yasein et al. 2015; Haj-Yasein et al. 2012). The authors  
680 concluded that ECS shrinkage (caused by activity-dependent astrocyte water uptake) is  
681 normally offset by an osmotically-driven water efflux through perisynaptic AQP4  
682 channels. Our findings suggest that bath application of hACSF into the slice similarly  
683 produces a rapid AQP4-independent influx of water into the astrocyte, from which it  
684 cannot efficiently escape because the AQP4 efflux pathway has been removed.

685           Interestingly, some recent studies suggest that rapid water influx through AQP4  
686 may be important for opening stretch activated channels associated with astrocyte  
687 volume regulation (Benfenati et al. 2011; Jo et al. 2015; Mola et al. 2016). This so-called  
688 “isovolumetric regulation” (IVR), involving efflux of intracellular osmolytes into the ECS,  
689 is generally observed with small and gradual changes in osmolarity, and in some cases  
690 can completely prevent swelling of glial cells or tissue slices (Franco et al. 2000; Lohr  
691 and Yohe 2000). IVR is easily overwhelmed by more rapid or larger osmotic shifts (Lohr  
692 and Yohe 2000), which may explain the lack of visible IVR in the current study. Thus, it

693 is possible that volume regulatory mechanisms are actively resisting volume change in  
694 wild-type astrocytes, and that such mechanisms are impaired in AQP4<sup>-/-</sup> astrocytes.  
695 Regardless of underlying mechanism, our findings suggest that: a) AQP4 is not required  
696 for rapid water influx into CA1 neurons or astrocytes; and b) AQP4 may serve as an  
697 important water *efflux* pathway that helps limit the extent of astrocyte swelling.

698 The observation that the effects of AQP4<sup>-/-</sup> on astrocyte swelling are hACSF  
699 dose-dependent is not unprecedented. Thrane et al. (2011) observed a reduction in  
700 AQP4<sup>-/-</sup> astrocyte swelling in 20% hACSF, but no difference in 30% hACSF. A direct  
701 comparison of their findings to ours is somewhat complicated, as Thrane et al. used  
702 different hACSF doses and longer imaging intervals (5-10 min) relative to ours. Based  
703 on the direction of the effect of AQP4 deletion on astrocyte swelling, however, it is  
704 tempting to speculate that Thrane and coworkers might have also observed augmented  
705 astrocyte swelling in 40% hACSF. It is also important to note that Thrane et al.  
706 measured AQP4<sup>-/-</sup> astrocyte volume in the cortex, while we recorded effects on s.r.  
707 astrocytes in CA1. AQP4 expression levels and patterns are quite distinct between  
708 these two regions (Hubbard et al. 2015), and it is possible that the role of AQP4 in water  
709 movement is also brain region-dependent. Although the exact effects of AQP4 deletion  
710 on astrocyte swelling differed between the two sets of data, both suggest that the role of  
711 AQP4 in water movement is governed by the severity of the osmotic challenge.

712 If neurons are indeed swelling in hACSF, then what is the route of water influx?  
713 Clues to this answer may lie in other conditions which cause neuronal swelling. While  
714 hypoosmolar swelling has generally been reported only in dissociated neurons *in vitro*  
715 (Aitken et al. 1998; Boss et al. 2013; Inoue et al. 2005; Somjen 1999), pyramidal

716 neurons have long been known to swell in excitotoxic conditions (Choi 1992; Risher et  
717 al. 2009; Zhou et al. 2010). Massive intracellular sodium influx (as observed in cases of  
718 continuous neuronal firing or excessive NMDA receptor activation) can cause sufficient  
719 depolarization to open voltage-gated  $\text{Cl}^-$  channels, with the resulting increase in  
720 intracellular osmolarity (from both  $\text{Na}^+$  and  $\text{Cl}^-$ ) producing an osmotic gradient into the  
721 neuron (Rungta et al. 2015). This highlights the fact that, despite lacking functional  
722 water channels, neurons are capable of taking on water through alternate means quite  
723 rapidly. Consistent with this, spreading depression (a wave of depolarization,  
724 excessively high  $\text{K}^+$  and glutamate release in the extracellular space) has been reported  
725 in hyposmolar conditions (Chebabo et al. 1995a; Huang et al. 1995) and can induce  
726 excitotoxic neuronal swelling (Zhou et al. 2010). There is little reason to believe an  
727 excitotoxic mechanism is directly responsible for the observed neuronal swelling in our  
728 model, as it was unaffected by NMDA receptor blockers, and we have previously found  
729 no evidence of spreading depression in hACSF (Lauderdale et al. 2015). Instead, we  
730 propose that the osmotic gradient, which drives water into a neuron following excessive  
731  $\text{Na}^+$  and  $\text{Cl}^-$  influx (Rungta et al. 2015), parallels the gradient imposed by hACSF on a  
732 neuron with normal intracellular ion concentrations. Routes for such water influx into  
733 neurons are not well defined. Two possible routes might be inferred from the known or  
734 hypothesized AQP4-independent pathways for water influx into astrocytes: simple water  
735 diffusion across the plasma membrane (Kimelberg 2005; Papadopoulos and Verkman  
736 2013), or water movement through a commonly-expressed cotransporter such as the  
737  $\text{Na}^+, \text{K}^+, 2\text{Cl}^-$  cotransporter NKCC1 (Jayakumar and Norenberg 2010; Kimelberg 2005;  
738 Macaulay and Zeuthen 2012; MacVicar et al. 2002; Su et al. 2002a; Su et al. 2002b;



739 Yan et al. 2003). Neither of these water pathways is likely to be exclusive to astrocytes,  
740 and the similarity in swelling profiles between neurons and astrocytes in our standard  
741 hACSF conditions might suggest a common mechanism independent of AQP4. Future  
742 studies will explore potential mechanisms of water influx into astrocytes and neurons in  
743 hypoosmolar conditions.

744

## 745 **5 References**

746 Aitken PG, Borgdorff AJ, Juta AJ, Kiehart DP, Somjen GG, Wadman WJ. 1998. Volume  
747 changes induced by osmotic stress in freshly isolated rat hippocampal neurons.  
748 *Pflugers Arch* 436:991-8.

749 Amiry-Moghaddam M, Williamson A, Palomba M, Eid T, de Lanerolle NC, Nagelhus EA,  
750 Adams ME, Froehner SC, Agre P, Ottersen OP. 2003. Delayed K<sup>+</sup> clearance  
751 associated with aquaporin-4 mislocalization: phenotypic defects in brains of  
752 alpha-syntrophin-null mice. *Proc Natl Acad Sci U S A* 100:13615-20.

753 Anderova M, Benesova J, Mikesova M, Dzamba D, Honsa P, Kriska J, Butenko O,  
754 Novosadova V, Valihrach L, Kubista M and others. 2014. Altered astrocytic  
755 swelling in the cortex of alpha-syntrophin-negative GFAP/EGFP mice. *PLoS*  
756 *ONE* 9:e113444.

757 Andrew RD. 1991. Seizure and acute osmotic change: clinical and neurophysiological  
758 aspects. *J Neurol Sci* 101:7-18.

759 Andrew RD, Jarvis CR, Obeidat AS. 1999. Potential sources of intrinsic optical signals  
760 imaged in live brain slices. *Methods* 18:185-96, 179.

761 Andrew RD, Labron MW, Boehnke SE, Carnduff L, Kirov SA. 2007. Physiological  
762 evidence that pyramidal neurons lack functional water channels. *Cereb Cortex*  
763 17:787-802.

764 Andrew RD, Lobinowich ME, Osehobo EP. 1997. Evidence against volume regulation  
765 by cortical brain cells during acute osmotic stress. *Exp Neurol* 143:300-12.

766 Andrew RD, MacVicar BA. 1994. Imaging cell volume changes and neuronal excitation  
767 in the hippocampal slice. *Neuroscience* 62:371-83.

768 Azouz R, Alroy G, Yaari Y. 1997. Modulation of endogenous firing patterns by  
769 osmolarity in rat hippocampal neurones. *J Physiol* 502 ( Pt 1):175-87.

- 770 Benfenati V, Caprini M, Dovizio M, Mylonakou MN, Ferroni S, Ottersen OP, Amiry-  
771 Moghaddam M. 2011. An aquaporin-4/transient receptor potential vanilloid 4  
772 (AQP4/TRPV4) complex is essential for cell-volume control in astrocytes. Proc  
773 Natl Acad Sci U S A 108:2563-8.
- 774 Binder DK, Papadopoulos MC, Haggie PM, Verkman AS. 2004. In vivo measurement of  
775 brain extracellular space diffusion by cortical surface photobleaching. J Neurosci  
776 24:8049-56.
- 777 Borgdorff AJ, Somjen GG, Wadman WJ. 2000. Two mechanisms that raise free  
778 intracellular calcium in rat hippocampal neurons during hypoosmotic and low  
779 NaCl treatment. J Neurophysiol 83:81-9.
- 780 Boss D, Kuhn J, Jourdain P, Depeursinge C, Magistretti PJ, Marquet P. 2013.  
781 Measurement of absolute cell volume, osmotic membrane water permeability,  
782 and refractive index of transmembrane water and solute flux by digital  
783 holographic microscopy. J Biomed Opt 18:036007.
- 784 Caspi A, Benninger F, Yaari Y. 2009. KV7/M channels mediate osmotic modulation of  
785 intrinsic neuronal excitability. J Neurosci 29:11098-111.
- 786 Castilla-Guerra L, del Carmen Fernandez-Moreno M, Lopez-Chozas JM, Fernandez-  
787 Bolanos R. 2006. Electrolytes disturbances and seizures. Epilepsia 47:1990-8.
- 788 Chebabo SR, Hester MA, Aitken PG, Somjen GG. 1995a. Hypotonic exposure  
789 enhances synaptic transmission and triggers spreading depression in rat  
790 hippocampal tissue slices. Brain Res 695:203-16.
- 791 Chebabo SR, Hester MA, Jing J, Aitken PG, Somjen GG. 1995b. Interstitial space,  
792 electrical resistance and ion concentrations during hypotonia of rat hippocampal  
793 slices. J Physiol 487:685-97.
- 794 Choi DW. 1992. Excitotoxic cell death. J Neurobiol 23:1261-76.
- 795 Crowe WE, Altamirano J, Huerto L, Alvarez-Leefmans FJ. 1995. Volume changes in  
796 single N1E-115 neuroblastoma cells measured with a fluorescent probe.  
797 Neuroscience 69:283-96.
- 798 Darby M, Kuzmiski JB, Panenka W, Feighan D, MacVicar BA. 2003. ATP released from  
799 astrocytes during swelling activates chloride channels. J Neurophysiol 89:1870-7.
- 800 Dissing-Olesen L, LeDue JM, Rungta RL, Hefendehl JK, Choi HB, MacVicar BA. 2014.  
801 Activation of neuronal NMDA receptors triggers transient ATP-mediated  
802 microglial process outgrowth. J Neurosci 34:10511-27.
- 803 Eid T, Lee TS, Thomas MJ, Amiry-Moghaddam M, Bjornsen LP, Spencer DD, Agre P,  
804 Ottersen OP, de Lanerolle NC. 2005. Loss of perivascular aquaporin 4 may

- 805 underlie deficient water and K<sup>+</sup> homeostasis in the human epileptogenic  
806 hippocampus. *Proc Natl Acad Sci U S A* 102:1193-8.
- 807 Feng G, Mellor RH, Bernstein M, Keller-Peck C, Nguyen QT, Wallace M, Nerbonne JM,  
808 Lichtman JW, Sanes JR. 2000. Imaging neuronal subsets in transgenic mice  
809 expressing multiple spectral variants of GFP. *Neuron* 28:41-51.
- 810 Fiacco TA, Agulhon C, Taves SR, Petravicz J, Casper KB, Dong X, Chen J, McCarthy  
811 KD. 2007. Selective stimulation of astrocyte calcium in situ does not affect  
812 neuronal excitatory synaptic activity. *Neuron* 54:611-26.
- 813 Franco R, Quesada O, Pasantes-Morales H. 2000. Efflux of osmolyte amino acids  
814 during isovolumic regulation in hippocampal slices. *J Neurosci Res* 61:701-11.
- 815 Gorelick DA, Praetorius J, Tsunenari T, Nielsen S, Agre P. 2006. Aquaporin-11: a  
816 channel protein lacking apparent transport function expressed in brain. *BMC*  
817 *Biochem* 7:14.
- 818 Gunnarson E, Zelenina M, Axehult G, Song Y, Bondar A, Krieger P, Brismar H, Zelenin  
819 S, Aperia A. 2008. Identification of a molecular target for glutamate regulation of  
820 astrocyte water permeability. *GLIA* 56:587-96.
- 821 Haj-Yasein NN, Bugge CE, Jensen V, Ostby I, Ottersen OP, Hvalby O, Nagelhus EA.  
822 2015. Deletion of aquaporin-4 increases extracellular K<sup>(+)</sup> concentration during  
823 synaptic stimulation in mouse hippocampus. *Brain Struct Funct* 220:2469-74.
- 824 Haj-Yasein NN, Jensen V, Ostby I, Omholt SW, Voipio J, Kaila K, Ottersen OP, Hvalby  
825 O, Nagelhus EA. 2012. Aquaporin-4 regulates extracellular space volume  
826 dynamics during high-frequency synaptic stimulation: a gene deletion study in  
827 mouse hippocampus. *Glia* 60:867-74.
- 828 Haskew-Layton RE, Rudkouskaya A, Jin Y, Feustel PJ, Kimelberg HK, Mongin AA.  
829 2008. Two distinct modes of hypoosmotic medium-induced release of excitatory  
830 amino acids and taurine in the rat brain in vivo. *PLoS ONE* 3:e3543.
- 831 Hirrlinger PG, Wurm A, Hirrlinger J, Bringmann A, Reichenbach A. 2008. Osmotic  
832 swelling characteristics of glial cells in the murine hippocampus, cerebellum, and  
833 retina in situ. *J Neurochem* 105:1405-17.
- 834 Huang R, Aitken PG, Somjen GG. 1995. The extent and mechanism of the loss of  
835 function caused by strongly hypotonic solutions in rat hippocampal slices. *Brain*  
836 *Res* 695:195-202.
- 837 Hubbard JA, Hsu MS, Seldin MM, Binder DK. 2015. Expression of the Astrocyte Water  
838 Channel Aquaporin-4 in the Mouse Brain. *ASN Neuro* 7.

- 839 Illarionova NB, Gunnarson E, Li Y, Brismar H, Bondar A, Zelenin S, Aperia A. 2010.  
840 Functional and molecular interactions between aquaporins and Na,K-ATPase.  
841 Neuroscience 168:915-25.
- 842 Inoue H, Mori S, Morishima S, Okada Y. 2005. Volume-sensitive chloride channels in  
843 mouse cortical neurons: characterization and role in volume regulation. Eur J  
844 Neurosci 21:1648-58.
- 845 Jayakumar AR, Norenberg MD. 2010. The Na-K-Cl Co-transporter in astrocyte swelling.  
846 Metab Brain Dis 25:31-8.
- 847 Jo AO, Ryskamp DA, Phuong TT, Verkman AS, Yarishkin O, MacAulay N, Krizaj D.  
848 2015. TRPV4 and AQP4 Channels Synergistically Regulate Cell Volume and  
849 Calcium Homeostasis in Retinal Muller Glia. J Neurosci 35:13525-37.
- 850 Katada R, Akdemir G, Asavapanumas N, Ratelade J, Zhang H, Verkman AS. 2014.  
851 Greatly improved survival and neuroprotection in aquaporin-4-knockout mice  
852 following global cerebral ischemia. FASEB J 28:705-14.
- 853 Kilb W, Dierkes PW, Sykova E, Vargova L, Luhmann HJ. 2006. Hypoosmolar conditions  
854 reduce extracellular volume fraction and enhance epileptiform activity in the CA3  
855 region of the immature rat hippocampus. J Neurosci Res 84:119-29.
- 856 Kimelberg HK. 1995. Current concepts of brain edema. Review of laboratory  
857 investigations. J Neurosurg 83:1051-9.
- 858 Kimelberg HK. 2004. Increased release of excitatory amino acids by the actions of ATP  
859 and peroxynitrite on volume-regulated anion channels (VRACs) in astrocytes.  
860 Neurochem Int 45:511-9.
- 861 Kimelberg HK. 2005. Astrocytic swelling in cerebral ischemia as a possible cause of  
862 injury and target for therapy. GLIA 50:389-397.
- 863 Kimelberg HK, Macvicar BA, Sontheimer H. 2006. Anion channels in astrocytes:  
864 biophysics, pharmacology, and function. GLIA 54:747-57.
- 865 Lauderdale K, Murphy T, Tung T, Davila D, Binder DK, Fiocco TA. 2015. Osmotic  
866 Edema Rapidly Increases Neuronal Excitability Through Activation of NMDA  
867 Receptor-Dependent Slow Inward Currents in Juvenile and Adult Hippocampus.  
868 ASN Neuro 7.
- 869 Liang D, Bhatta S, Gerzanich V, Simard JM. 2007. Cytotoxic edema: mechanisms of  
870 pathological cell swelling. Neurosurg Focus 22:E2.
- 871 Lohr JW, Grantham JJ. 1986. Isovolumetric regulation of isolated S2 proximal tubules in  
872 anisotonic media. J Clin Invest 78:1165-72.

- 873 Lohr JW, Yohe L. 2000. Isovolumetric regulation of rat glial cells during development  
874 and correction of hypo-osmolality. *Neurosci Lett* 286:5-8.
- 875 Ma T, Yang B, Gillespie A, Carlson EJ, Epstein CJ, Verkman AS. 1997. Generation and  
876 phenotype of a transgenic knockout mouse lacking the mercurial-insensitive  
877 water channel aquaporin-4. *J Clin Invest* 100:957-62.
- 878 Macaulay N, Zeuthen T. 2012. Glial K(+) clearance and cell swelling: key roles for  
879 cotransporters and pumps. *Neurochem Res* 37:2299-309.
- 880 MacVicar BA, Feighan D, Brown A, Ransom B. 2002. Intrinsic optical signals in the rat  
881 optic nerve: role for K(+) uptake via NKCC1 and swelling of astrocytes. *GLIA*  
882 37:114-23.
- 883 Mola MG, Sparaneo A, Gargano CD, Spray DC, Svelto M, Frigeri A, Scemes E, Nicchia  
884 GP. 2016. The speed of swelling kinetics modulates cell volume regulation and  
885 calcium signaling in astrocytes: A different point of view on the role of  
886 aquaporins. *GLIA* 64:139-54.
- 887 Nagelhus EA, Mathiisen TM, Ottersen OP. 2004. Aquaporin-4 in the central nervous  
888 system: cellular and subcellular distribution and coexpression with KIR4.1.  
889 *Neuroscience* 129:905-13.
- 890 Nielsen S, Nagelhus EA, Amiry-Moghaddam M, Bourque C, Agre P, Ottersen OP. 1997.  
891 Specialized membrane domains for water transport in glial cells: high-resolution  
892 immunogold cytochemistry of aquaporin-4 in rat brain. *J Neurosci* 17:171-80.
- 893 Papadopoulos MC, Manley GT, Krishna S, Verkman AS. 2004. Aquaporin-4 facilitates  
894 reabsorption of excess fluid in vasogenic brain edema. *FASEB J* 18:1291-3.
- 895 Papadopoulos MC, Verkman AS. 2013. Aquaporin water channels in the nervous  
896 system. *Nat Rev Neurosci* 14:265-77.
- 897 Pasantés-Morales H, Tuz K. 2006. Volume changes in neurons: hyperexcitability and  
898 neuronal death. *Contrib Nephrol* 152:221-40.
- 899 Risher WC, Andrew RD, Kirov SA. 2009. Real-time passive volume responses of  
900 astrocytes to acute osmotic and ischemic stress in cortical slices and in vivo  
901 revealed by two-photon microscopy. *GLIA* 57:207-21.
- 902 Risher WC, Croom D, Kirov Sa. 2012. Persistent astroglial swelling accompanies rapid  
903 reversible dendritic injury during stroke-induced spreading depolarizations. *Glia*  
904 60:1709-20.
- 905 Roper SN, Obenaus A, Dudek FE. 1992. Osmolality and nonsynaptic epileptiform bursts  
906 in rat CA1 and dentate gyrus. *Ann Neurol* 31:81-5.

- 907 Rosen AS, Andrew RD. 1990. Osmotic effects upon excitability in rat neocortical slices.  
908 Neuroscience 38:579-90.
- 909 Rothman SM, Olney JW. 1987. Excitotoxicity and the Nmda Receptor. Trends in  
910 Neurosciences 10:299-302.
- 911 Rungta RL, Choi HB, Tyson JR, Malik A, Dissing-Olesen L, Lin PJ, Cain SM, Cullis PR,  
912 Snutch TP, MacVicar BA. 2015. The cellular mechanisms of neuronal swelling  
913 underlying cytotoxic edema. Cell 161:610-21.
- 914 Schindelin J, Arganda-Carreras I, Frise E, Kaynig V, Longair M, Pietzsch T, Preibisch S,  
915 Rueden C, Saalfeld S, Schmid B and others. 2012. Fiji: an open-source platform  
916 for biological-image analysis. Nat Methods 9:676-82.
- 917 Schnell C, Hagos Y, Hulsmann S. 2012. Active Sulforhodamine 101 Uptake into  
918 Hippocampal Astrocytes. PLoS ONE 7.
- 919 Schnell C, Shahmoradi A, Wichert SP, Mayerl S, Hagos Y, Heuer H, Rossner MJ,  
920 Hulsmann S. 2015. The multispecific thyroid hormone transporter OATP1C1  
921 mediates cell-specific sulforhodamine 101-labeling of hippocampal astrocytes.  
922 Brain Struct Funct 220:193-203.
- 923 Schwartzkroin Pa, Baraban SC, Hochman DW. 1998. Osmolarity, ionic flux, and  
924 changes in brain excitability. Epilepsy Research 32:275-285.
- 925 Somjen GG. 1999. Low external NaCl concentration and low osmolarity enhance  
926 voltage-gated Ca currents but depress K currents in freshly isolated rat  
927 hippocampal neurons. Brain Res 851:189-97.
- 928 Song Y, Gunnarson E. 2012. Potassium dependent regulation of astrocyte water  
929 permeability is mediated by cAMP signaling. PLoS ONE 7:e34936.
- 930 Strohschein S, Huttmann K, Gabriel S, Binder DK, Heinemann U, Steinhauser C. 2011.  
931 Impact of aquaporin-4 channels on K<sup>+</sup> buffering and gap junction coupling in the  
932 hippocampus. GLIA 59:973-80.
- 933 Su G, Kintner DB, Flagella M, Shull GE, Sun DD. 2002a. Astrocytes from Na<sup>+</sup>-K<sup>+</sup>-Cl<sup>-</sup>  
934 cotransporter-null mice exhibit absence of swelling and decrease in EAA release.  
935 American Journal of Physiology-Cell Physiology 282:C1147-C1160.
- 936 Su G, Kintner DB, Sun D. 2002b. Contribution of Na<sup>(+)</sup>-K<sup>(+)</sup>-Cl<sup>(-)</sup> cotransporter to high-  
937 [K<sup>(+)</sup>]<sub>o</sub>- induced swelling and EAA release in astrocytes. Am J Physiol Cell  
938 Physiol 282:C1136-46.
- 939 Thrane AS, Rappold PM, Fujita T, Torres A, Bekar LK, Takano T, Peng W, Wang F,  
940 Rangroo Thrane V, Enger R and others. 2011. Critical role of aquaporin-4  
941 (AQP4) in astrocytic Ca<sup>2+</sup> signaling events elicited by cerebral edema. Proc Natl  
942 Acad Sci U S A 108:846-51.

- 943 Tuz K, Ordaz B, Vaca L, Quesada O, Pasantos-Morales H. 2001. Isovolumetric  
944 regulation mechanisms in cultured cerebellar granule neurons. *J Neurochem*  
945 79:143-51.
- 946 Wetherington J, Serrano G, Dingledine R. 2008. Astrocytes in the Epileptic Brain.  
947 *Neuron* 58:168-178.
- 948 Wurm A, Lipp S, Pannicke T, Linnertz R, Krugel U, Schulz A, Farber K, Zahn D, Grosse  
949 J, Wiedemann P and others. 2010. Endogenous purinergic signaling is required  
950 for osmotic volume regulation of retinal glial cells. *J Neurochem* 112:1261-72.
- 951 Xie AX, Lauderdale K, Murphy T, Myers TL, Fiacco TA. 2014. Inducing plasticity of  
952 astrocytic receptors by manipulation of neuronal firing rates. *J Vis Exp*:1-13.
- 953 Yan Y, Dempsey RJ, Flemmer A, Forbush B, Sun D. 2003. Inhibition of Na(+)-K(+)-Cl(-)  
954 cotransporter during focal cerebral ischemia decreases edema and neuronal  
955 damage. *Brain Res* 961:22-31.
- 956 Yao X, Hrabetova S, Nicholson C, Manley GT. 2008. Aquaporin-4-deficient mice have  
957 increased extracellular space without tortuosity change. *J Neurosci* 28:5460-4.
- 958 Zhou N, Gordon GR, Feighan D, MacVicar BA. 2010. Transient swelling, acidification,  
959 and mitochondrial depolarization occurs in neurons but not astrocytes during  
960 spreading depression. *Cereb Cortex* 20:2614-24.  
961  
962
- 963  
964  
965  
966  
967  
968  
969  
970  
971  
972  
973

974 **Figure 1:**

975  
976  
977  
978  
979  
980  
981  
982  
983  
984  
985  
986  
987  
988  
989  
990  
991  
992  
993  
994  
995  
996

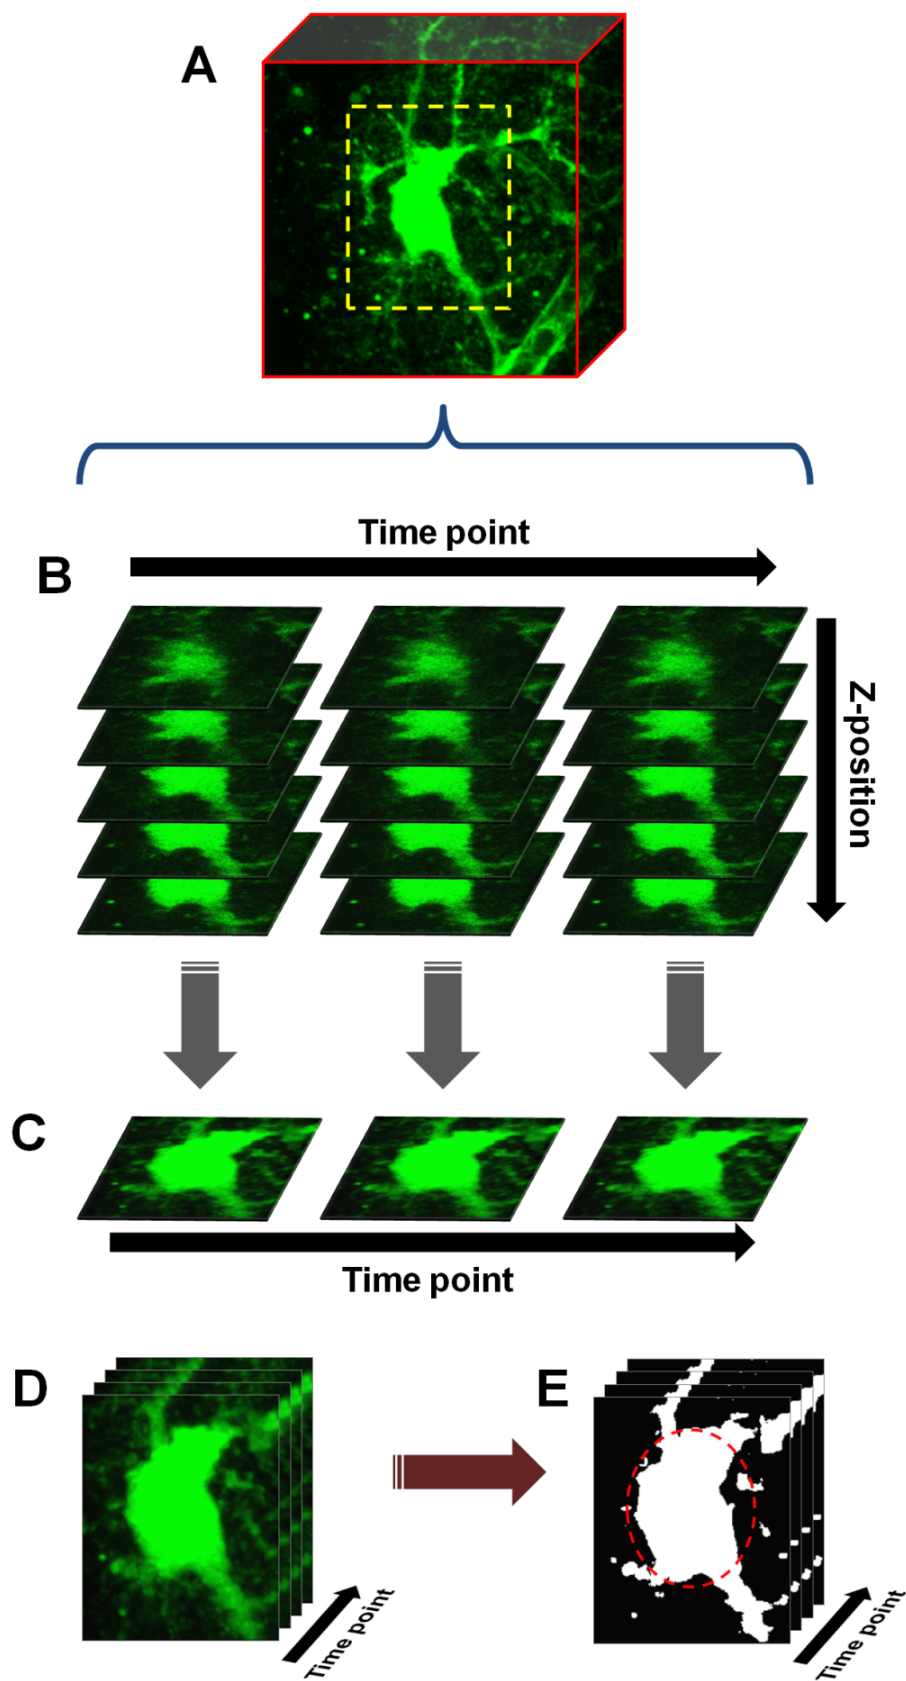



997 **Figure 1: Basic protocol for cell volume analysis. (A)** An astrocyte or neuron,  
998 fluorescently labeled by patch clamp or other means, is chosen and a scanning region  
999 (dashed yellow box) selected which closely encompasses the soma. Starting with  
1000 baseline (measurement taken in normosmolar ACSF prior to hACSF application), z-  
1001 stacks are taken through the soma at one minute intervals. During analysis, these  
1002 stacks (x-y-z) are concatenated into a time-series (x-y-z-t) hyperstack **(B)**. The  
1003 hyperstack is filtered and collapsed in the z-axis to produce a time series (x-y-t)  
1004 composed of max-intensity projections **(C)**. After alignment, cropping and background  
1005 subtraction are performed on this series, the resulting “processed” time series **(D)** is  
1006 finally thresholded to produce a binary image series **(E)**. An elliptical ROI (dashed red  
1007 oval) is drawn around the soma, and any pixels above threshold within this ROI are  
1008 quantified.

1009

1010

1011

1012

1013

1014

1015

1016

1017

1018

1019

1020 **Figure 2:**

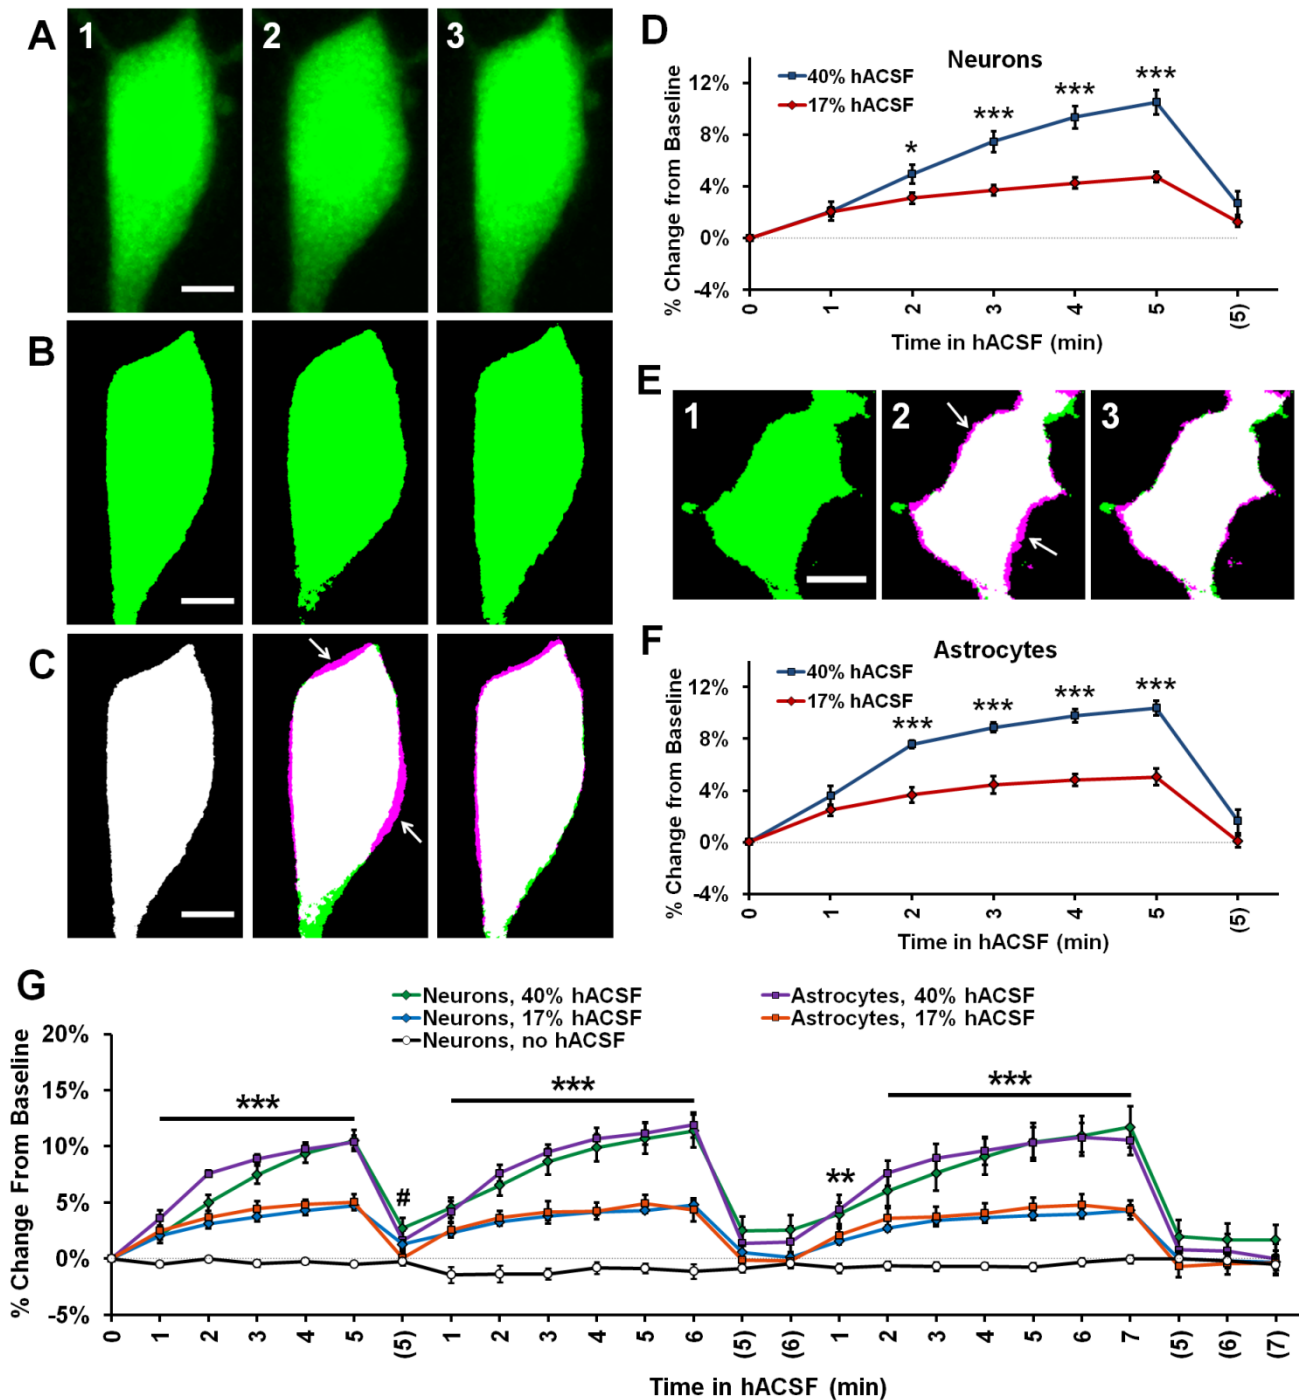

1021 **Figure 2: Neurons and astrocytes both swell in hypoosmolar conditions. (A)**

1022 Representative max-intensity projections of a CA1 pyramidal neuron loaded with Alexa

1023 Fluor 488 dye via patch clamp, depicting soma volume at baseline (A1), followed by 5

1024 minutes in 40% hACSF (A2), and a subsequent 5 minute wash period in nACSF (A3).  
1025 Swelling of the soma during hACSF application is readily apparent in A2. **(B)** Time  
1026 points in (A1-A3) are processed and binarized (see figure 1) to allow measurement of  
1027 soma area. Images are pseudocolored green for easier comparison with (A). **(C)** Each  
1028 thresholded image in (B) is pseudocolored magenta and overlaid with green baseline  
1029 image from (B) to reveal regions of soma expansion during 40% hACSF, which recover  
1030 to near basal levels upon return to nACSF (magenta highlights, indicated by white  
1031 arrows). Scale bars = 5  $\mu$ m. **(D)** Quantification of neuronal soma volume as a percent  
1032 change from baseline area in 17% and 40% hACSF conditions over a single 5-minute  
1033 application, followed by a 5 minute wash period denoted with (5). Time points 0, 5 and  
1034 (5) correspond to images in A1, A2 and A3 respectively. **(E)** Representative thresholded  
1035 images of an astrocyte loaded with Alexa Fluor 488 dextran (10,000 MW) at baseline  
1036 (C1), after 5 minutes in 40% hACSF (C2), and after a 5 minute wash in nACSF (C3). As  
1037 in (A), images in (C2) and (C3) have been overlaid with the baseline image to illustrate  
1038 changes in cell volume (white arrows). Scale bar = 5  $\mu$ m. **(F)** Quantification of astrocyte  
1039 soma volume as a percent change from baseline area in 17% and 40% hACSF  
1040 conditions. \* $p < 0.05$  and \*\*\* $p < 0.001$  for 17% vs. 40% at each time point in B and D.  
1041 All time points for both 17% and 40% hACSF were significantly elevated over baseline.  
1042 **(G)** Expanded time course showing neuron and astrocyte volume changes over multiple  
1043 re-applications of 40% or 17% hACSF. Neuron volume in control conditions (“no  
1044 hACSF”, black line) is included for comparison. \*\*\* $p < 0.001$ , \*\* $p < 0.01$  (both cell types)  
1045 and # $p < 0.05$  (astrocytes only), percent change versus 0% (baseline). N=7-9 cells per  
1046 hACSF group and 6 cells for control.

1047 **Figure 3:**

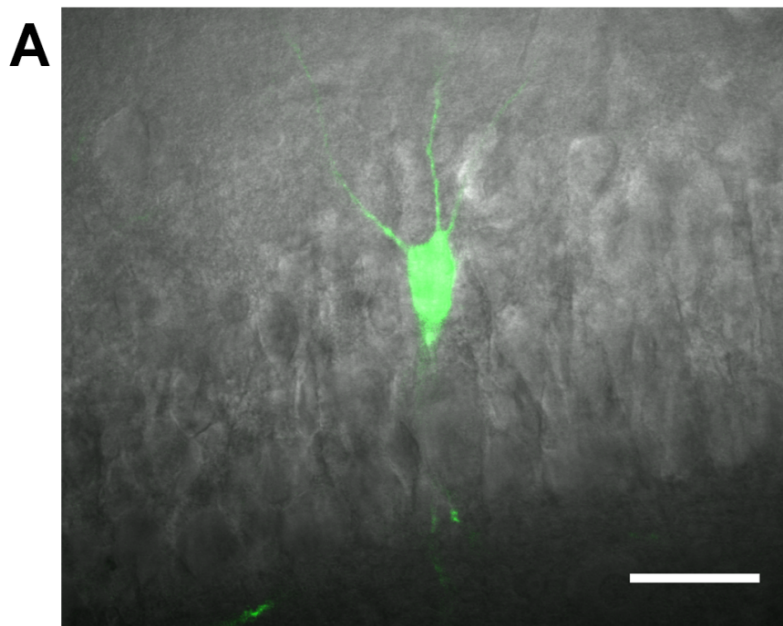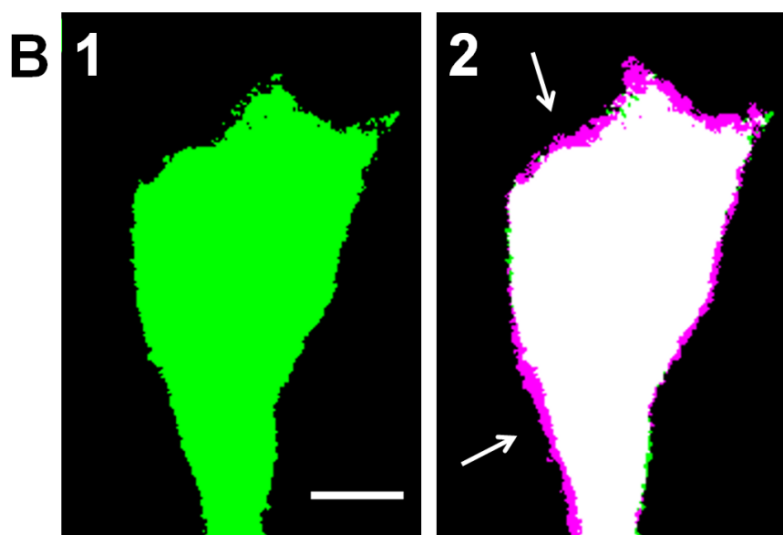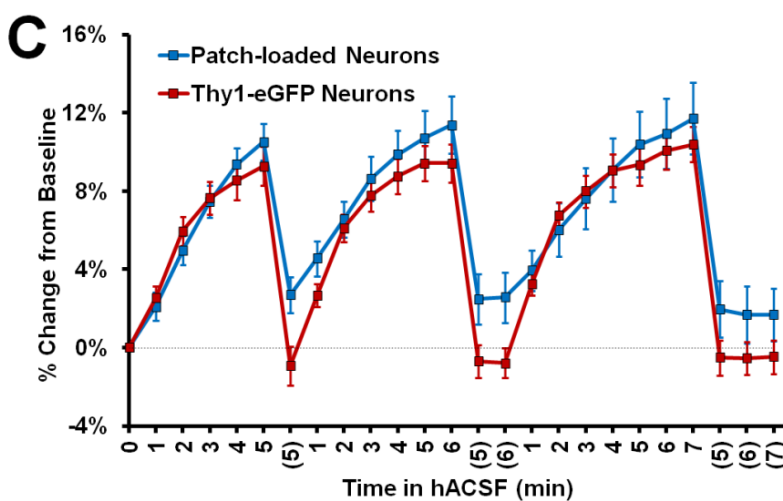

1070 **Figure 3: Neuronal swelling persists in Thy1-eGFP neurons. (A)** Merged infrared  
1071 (IR) and fluorescent images from a section of the CA1 pyramidal layer in a typical Thy1-  
1072 eGFP hippocampal slice. GFP-positive neurons are random and generally very sparse,  
1073 as shown here. **(B)** Representative thresholded images depicting a Thy1-eGFP neuron  
1074 at standard imaging depth (~30-40  $\mu\text{m}$  deep) at baseline (B1) and 5 minute 40% hACSF  
1075 time points (B2). Baseline image is overlaid in B2 to reveal soma size increases  
1076 (magenta regions, indicated by white arrows). **(C)** Volume change in neurons exposed  
1077 to 40% hACSF, labeled either by patch clamp dialysis of dye (“Patch loaded”, Alexa  
1078 Fluor 488 or 594 hydrazide) or by expression of eGFP.

1079

1080

1081

1082

1083

1084

1085

1086

1087

1088

1089

1090

1091

1092

1093 **Figure 4:**

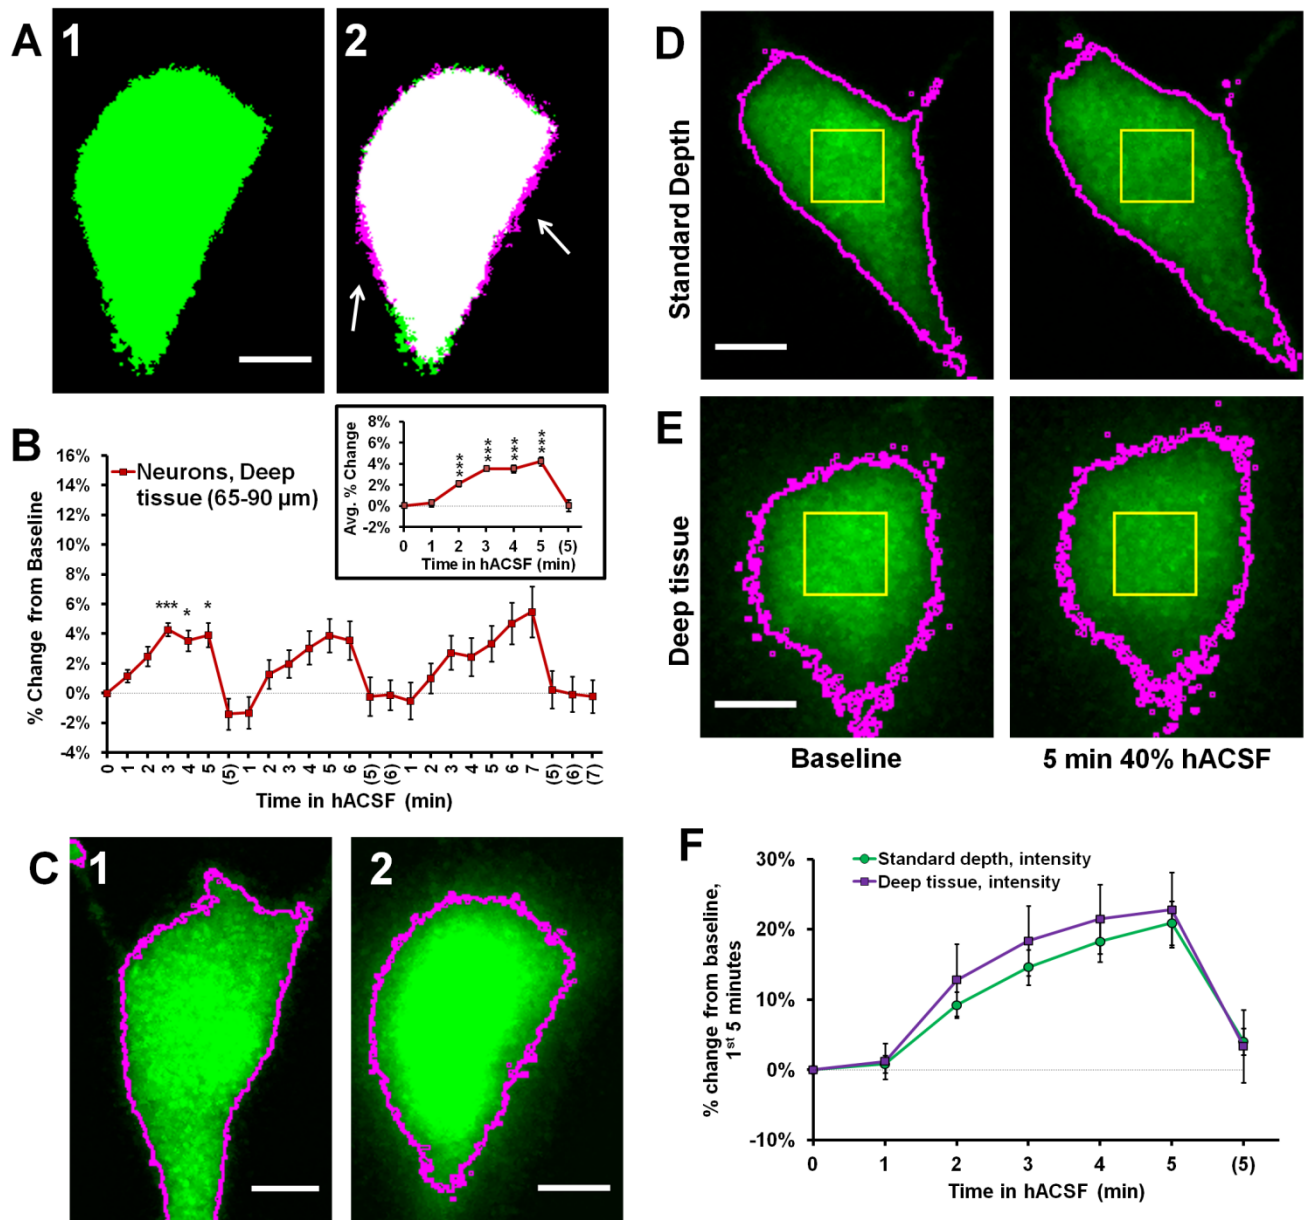

1094 **Figure 4: Intensity measurements reveal similar volume change between**  
 1095 **superficial and deep neurons. (A)** Representative thresholded images of a Thy1-  
 1096 eGFP neuron taken from deep tissue (~65-90  $\mu\text{m}$  below slice surface) at baseline (A1)  
 1097 and 5 minute 40% hACSF (A2) time points. Magenta regions (indicated by white  
 1098 arrows) show areas of cell volume increase. **(B)** Volume change in deep Thy1-eGFP  
 1099 neurons exposed to 40% hACSF, measured using our standard analysis method. Inset

1100 displays average percent change across hACSF applications. The apparent reduction in  
1101 volume change as compared to shallower neurons (e.g. Figure 3) is most likely an  
1102 artifact of lower cellular resolution at depth, which is poorly handled by our standard  
1103 analysis technique. **(C)** Illustration of the analysis problem posed by deeper neurons.  
1104 Raw image MIPs from 5 minute hACSF time point for a typical shallow (C1) and deep  
1105 (C2) neuron, illustrating the analysis problem posed by the latter. Images have been  
1106 brightened to enhance visibility of the cell border. Magenta lines indicate borders of  
1107 thresholded area for each cell after final processing (see figs. 3B and 4A for respective  
1108 thresholded images), from which soma area is typically calculated. Shallower neurons  
1109 (C1) have well-defined borders in the raw MIP which are almost completely preserved  
1110 after thresholding, allowing for highly-accurate measurements of soma area in these  
1111 cells. In contrast, the “fuzzy” borders of deeper neurons (C2) are poorly thresholded and  
1112 insufficient for detecting volume changes. Scale bars = 5  $\mu\text{m}$ . **(D)** Standard  
1113 (thresholding) and microspectrofluorimetric (fluorescence intensity) methods applied to  
1114 a standard-depth neuron at baseline (left) and 5 minute 40% hACSF (right) time points.  
1115 As in (C), magenta outlines indicate cell area calculated by thresholding. Yellow ROIs  
1116 denote the 5  $\mu\text{m}$  x 5  $\mu\text{m}$  region from which average fluorescence intensity was  
1117 measured. **(E)** Analysis methods from (D) applied to a deep neuron. While thresholded  
1118 borders are inaccurate as expected, fluorescence intensity within the yellow ROI  
1119 decreases to a similar degree between this deep neuron and the more superficial  
1120 neuron in (D). **(F)** Percent change over the 1<sup>st</sup> 5 minutes of 40% hACSF, calculated  
1121 from changes in average fluorescence intensity in both standard depth and deep  
1122 neurons. \*\*\* $p < 0.001$ , \* $p < 0.05$ , percent change vs. 0% (baseline).

1123 **Figure 5:**

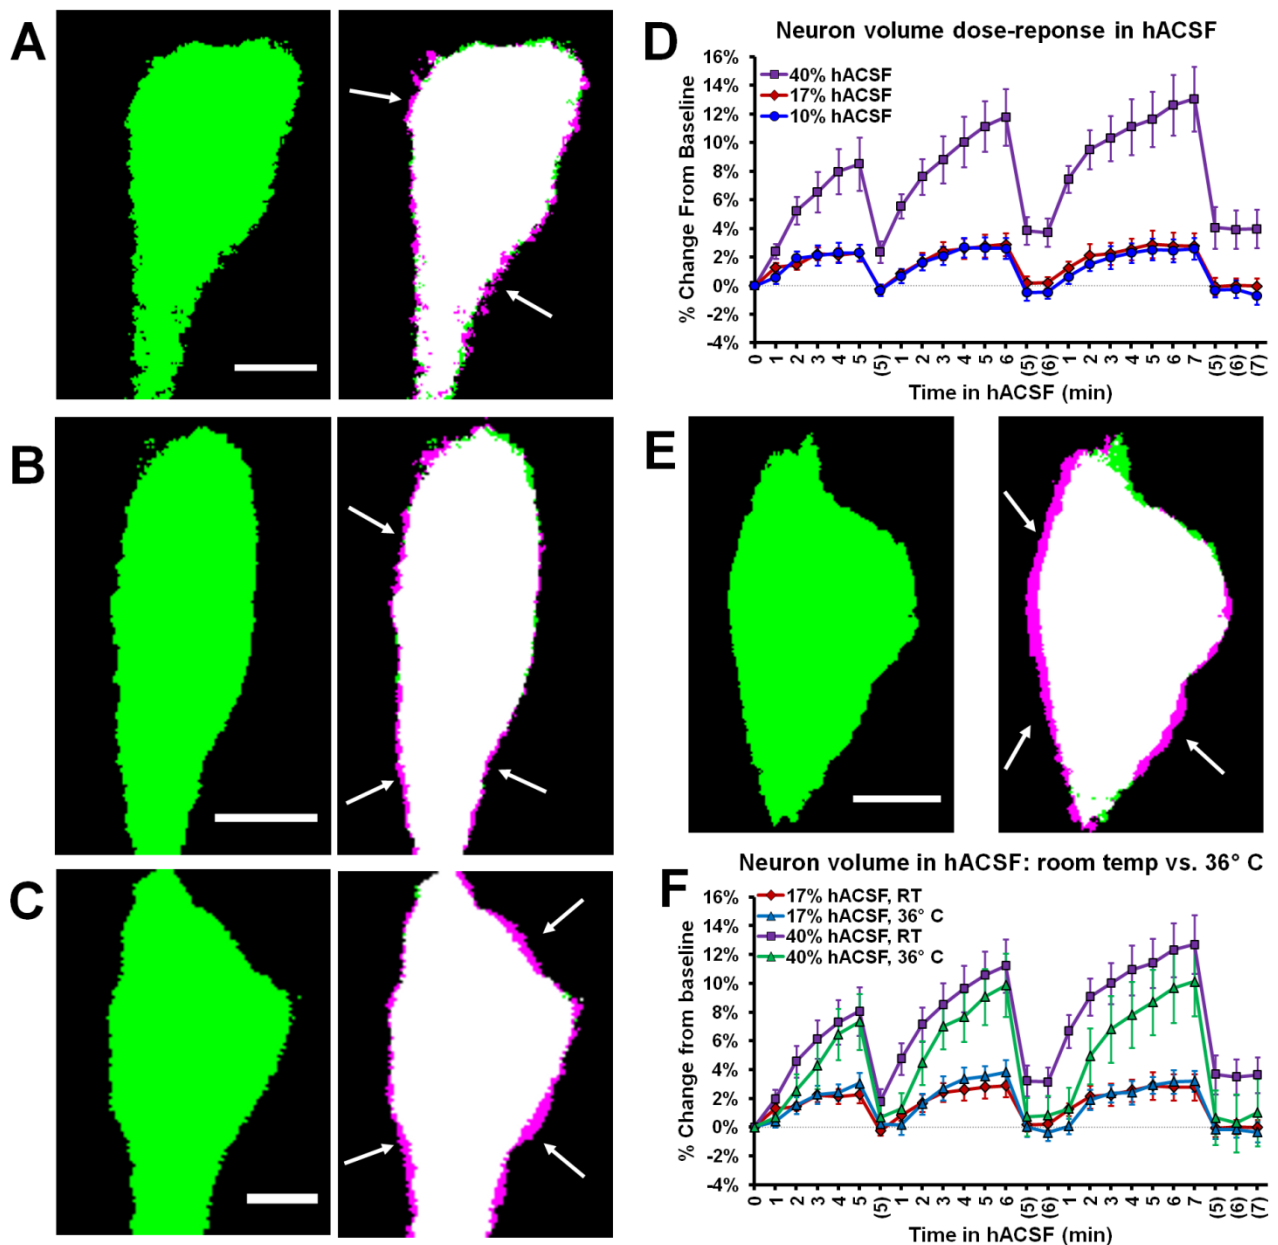

1124

1125 **Figure 5: Neuronal swelling occurs across a range of hypoosmolar doses and at**  
1126 **physiological temperature.** Volume changes observed in Thy1-eGFP neurons  
1127 exposed to antagonist-free 10% **(A)**, 17% **(B)**, or 40% hACSF **(C)** at room temperature.  
1128 Thresholded baseline images (green, left) are overlaid with images taken 5 min. after



1129 exposure to hACSF (right) to illustrate swelling of the soma (magenta edges, indicated  
1130 by white arrows). **(D)** Neuronal volume as percent change from baseline during  
1131 application of 10%, 17% and 40% antagonist-free hACSF doses. **(E)** Thresholded  
1132 images of a neuron at baseline (left) and after 5 minutes in 40% hACSF (right),  
1133 recorded at physiological temperature (36° C). As in A-C, right image is an overlay of 5  
1134 minute hACSF (magenta) and baseline (green) time point images, with white arrows  
1135 indicating magenta regions of cell soma expansion. **(F)** Volume changes compared  
1136 between neurons imaged at room temperature and 36° C, in both 17% and 40%  
1137 hACSF. No significant difference was observed between the two temperatures at either  
1138 dose of hACSF. Scale bars, 5  $\mu$ m each for A-C and E.

1139

1140

1141

1142

1143

1144

1145

1146

1147

1148

1149

1150

1151

1152 **Figure 6:**

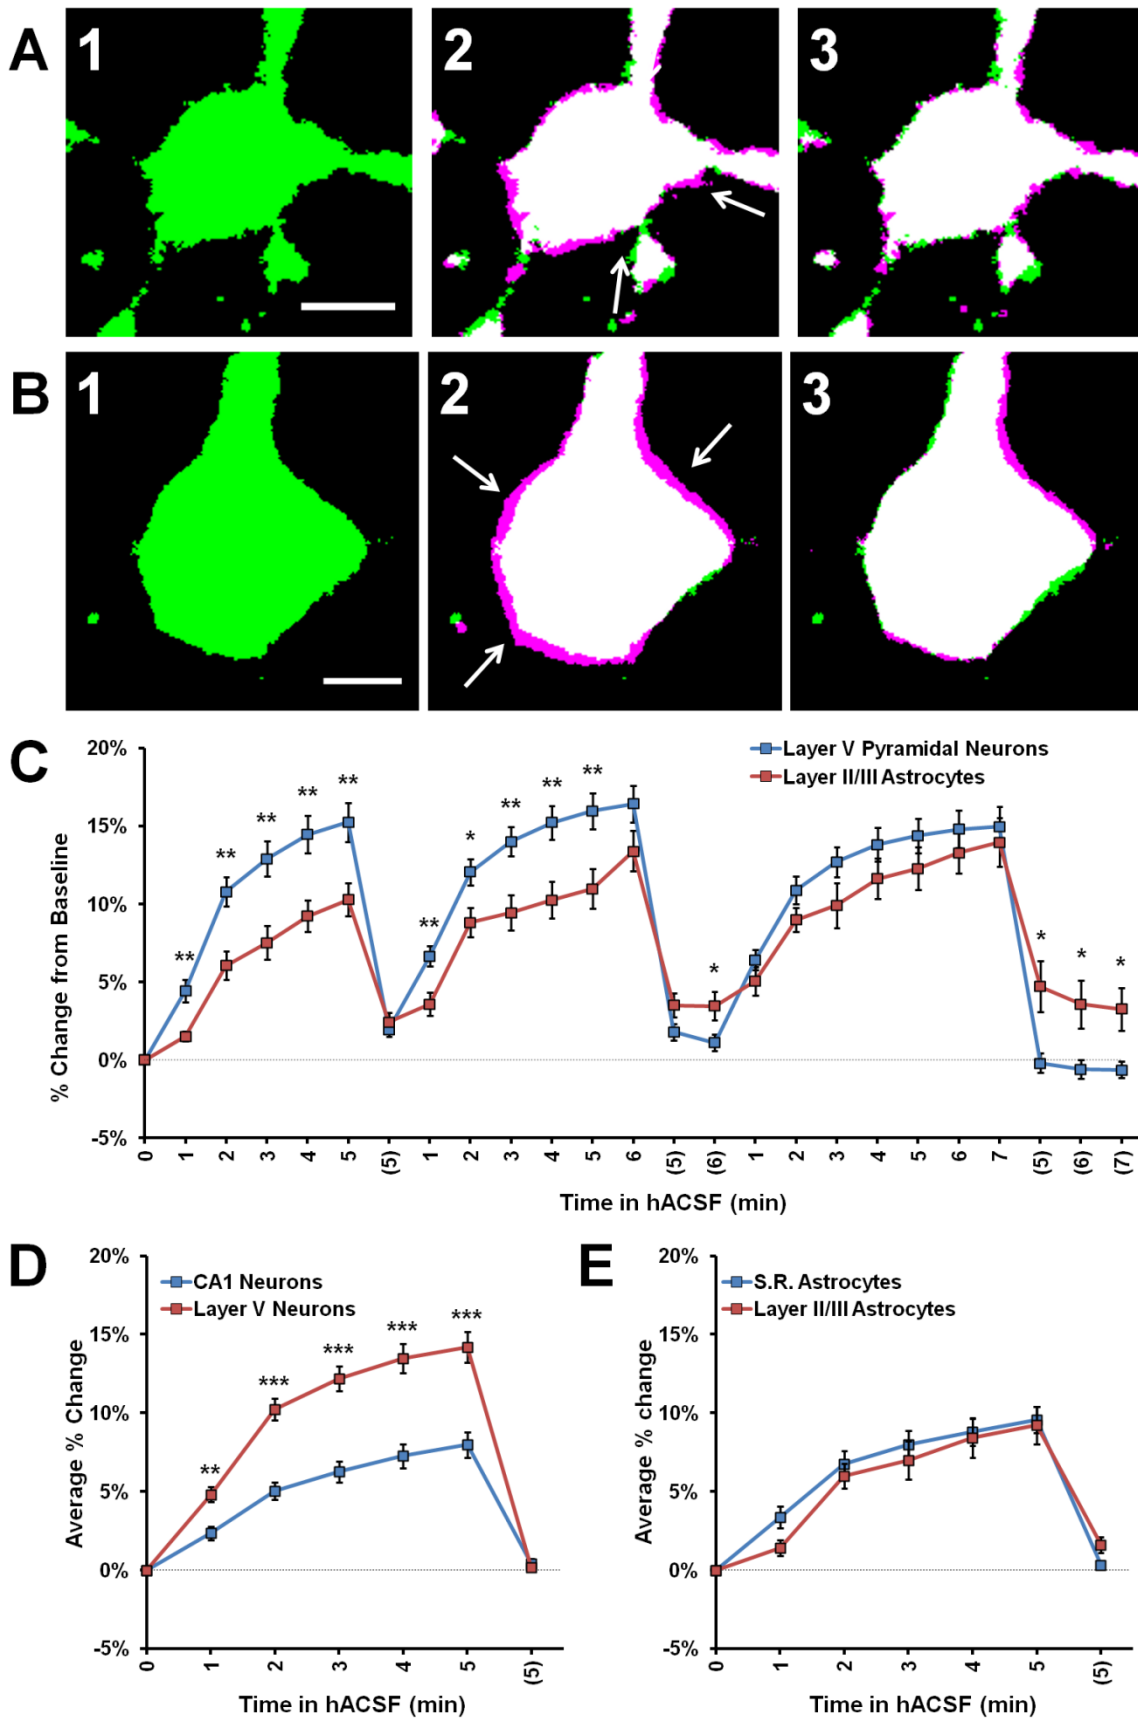

1154 **Figure 6: Cortical neurons swell significantly more than cortical astrocytes in 40%**  
1155 **hACSF. (A)** Representative thresholded image of an astrocyte from cortical layer II/III at  
1156 baseline (A1), overlaid with an image after 5 minutes in antagonist-free 40% hACSF  
1157 (A2) and after 5 minutes of return to standard ACSF (A3). **(B)** Representative pyramidal  
1158 neuron from cortical layer V at baseline (B1), overlaid with 5 minute antagonist-free 40%  
1159 hACSF (B2) and 5 minute standard ACSF wash (B3) time point images, as in (A).  
1160 Magenta highlights surrounding the cell border in (A2) and (B2), indicated by white  
1161 arrows, reflect increases in cell volume over baseline. Scale bars, 5  $\mu$ m. **(C)** Percent  
1162 change from baseline quantified for cortical (Layer V) neurons and cortical (layer II/III)  
1163 astrocytes. Note that cortical neurons swell significantly more than astrocytes during the  
1164 first two applications of hACSF. **(D)** Comparisons of average percent change over the  
1165 three hACSF applications reveal that cortical neurons swell to approximately twice the  
1166 size of hippocampal neurons in hACSF, while cortical astrocytes **(E)** show similar  
1167 responses as hippocampal astrocytes. \* $p < 0.05$ , \*\* $p < 0.01$ , \*\*\* $p < 0.001$ , layer V  
1168 neurons versus: layer II/III astrocytes (C) or CA1 neurons (D).

1169

1170

1171

1172

1173

1174

1175

1176

1177 **Figure 7:**

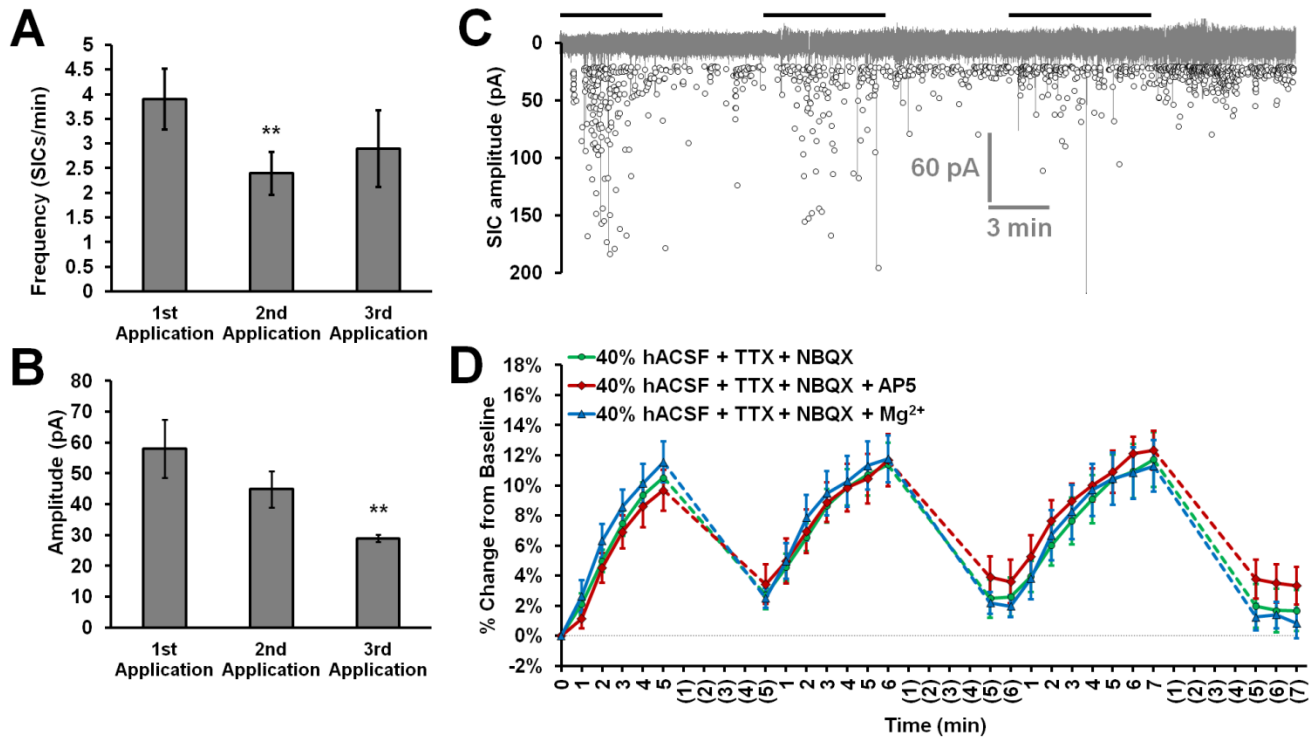

1178 **Figure 7: Neuronal swelling is not due to NMDA receptor activation. (A)** Average  
1179 SIC frequency and **(B)** amplitude during each application of 40% hACSF; \*\*p < 0.01  
1180 versus 1<sup>st</sup> application. **(C)** Aggregated representation of SIC activity over a typical  
1181 course of hACSF treatment. Black bars above the trace indicate periods of 40% hACSF.  
1182 Background trace (grey) shows a voltage-clamp recording of NMDA receptor activity  
1183 from a typical CA1 pyramidal neuron during 40% hACSF application, while foreground  
1184 scatterplot shows the overall distribution of SIC activity across all neurons over time (n =  
1185 11). **(D)** Neuron soma area measured as percent change from baseline over multiple  
1186 applications of standard 40% hACSF (containing 10  $\mu$ M NBQX and 1  $\mu$ M TTX, to match  
1187 conditions in which SICs are observed), 40% hACSF + 50  $\mu$ M AP5, or 40% hACSF + 6  
1188 mM Mg<sup>2+</sup>. Time points in (C) and (D) are vertically aligned to facilitate comparison of  
1189 neuronal SICs and volume changes. Neither AP5 nor high Mg<sup>2+</sup> were effective in  
1190 blocking neuronal swelling.

1191 **Figure 8:**

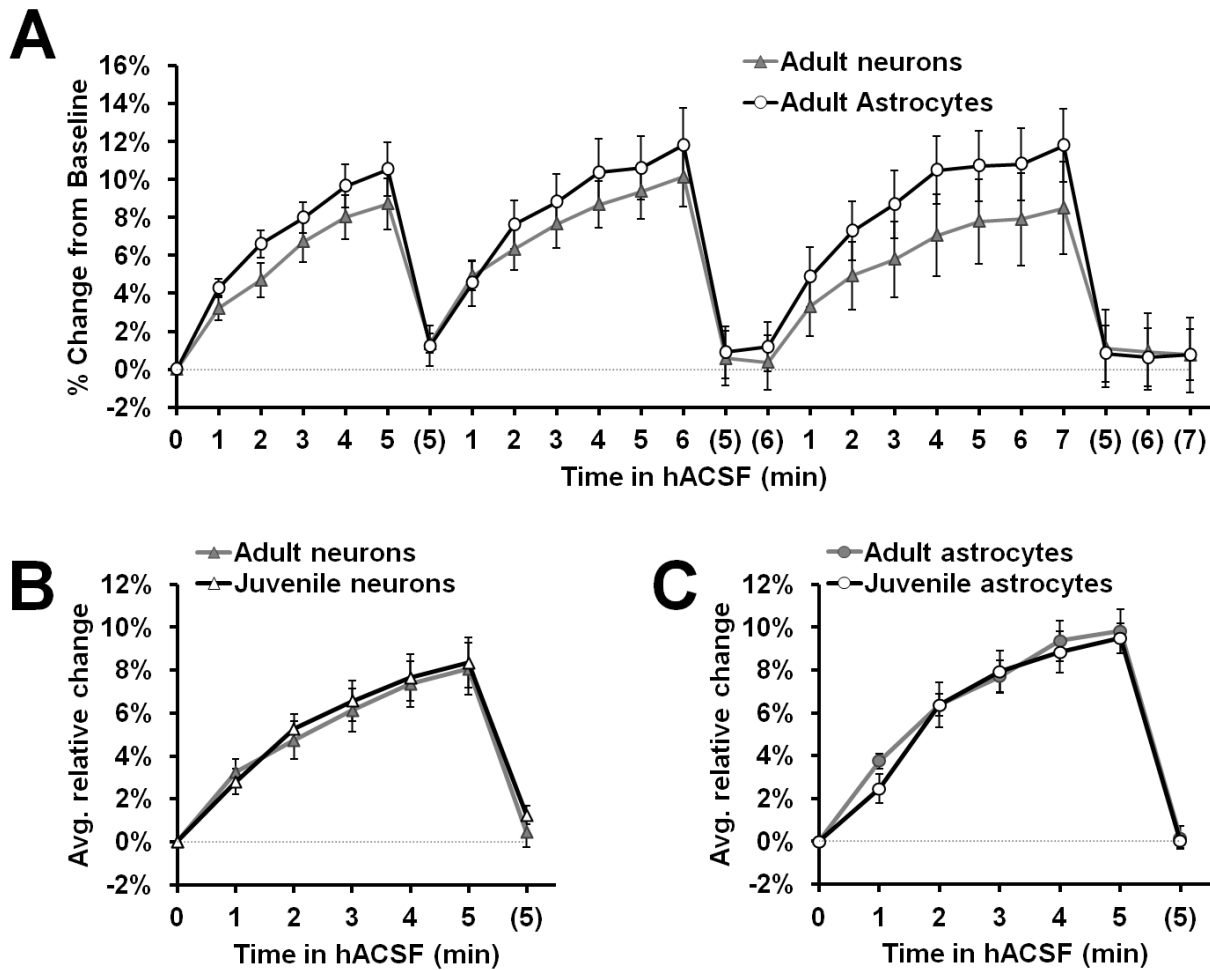

1192

1193 **Figure 8: Neuron and astrocyte volume changes in 40% hACSF do not differ**

1194 **between juveniles and adults. (A)** Rapid neuron and astrocyte swelling was observed

1195 in adult hippocampal slices when repeatedly exposed to physiological 40% hACSF. As

1196 with juveniles, adult astrocytes and neurons did not differ significantly in their responses

1197 to hACSF. **(B)** Average percent change across 3 hACSF applications for adult and

1198 juvenile CA1 pyramidal neurons. **(C)** Average percent change across 3 hACSF

1199 applications for adult and juvenile s.r. astrocytes. Adults and juveniles did not differ in

1200 average percent change for either cell type shown in B and C.

1201 **Figure 9:**

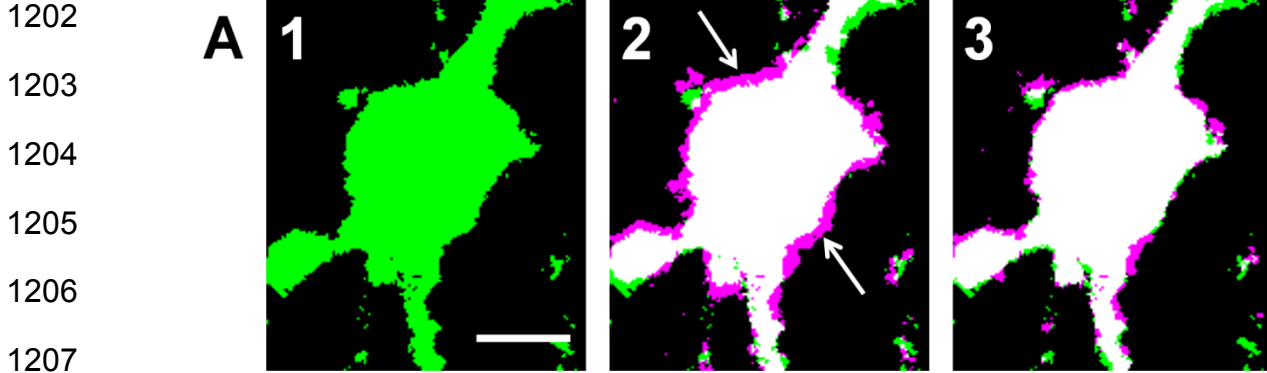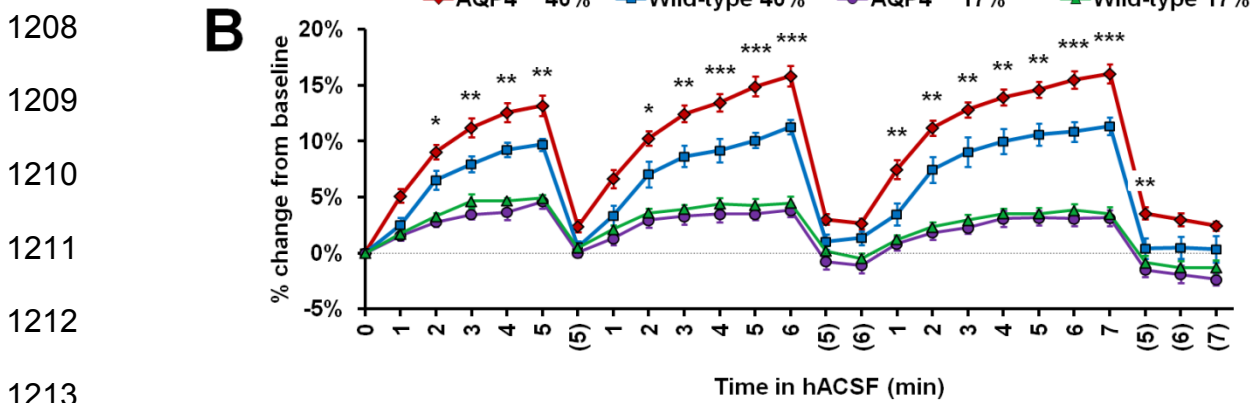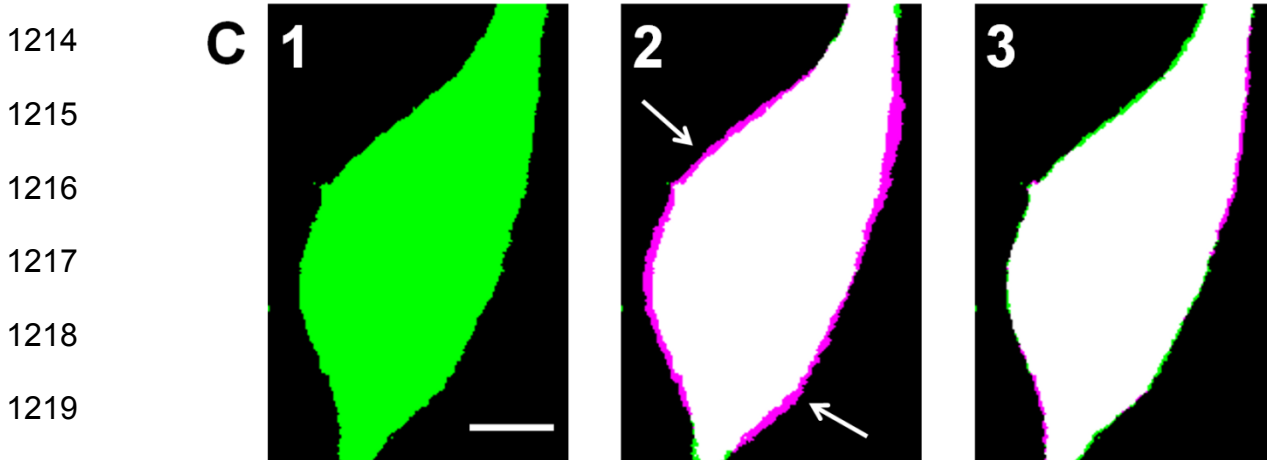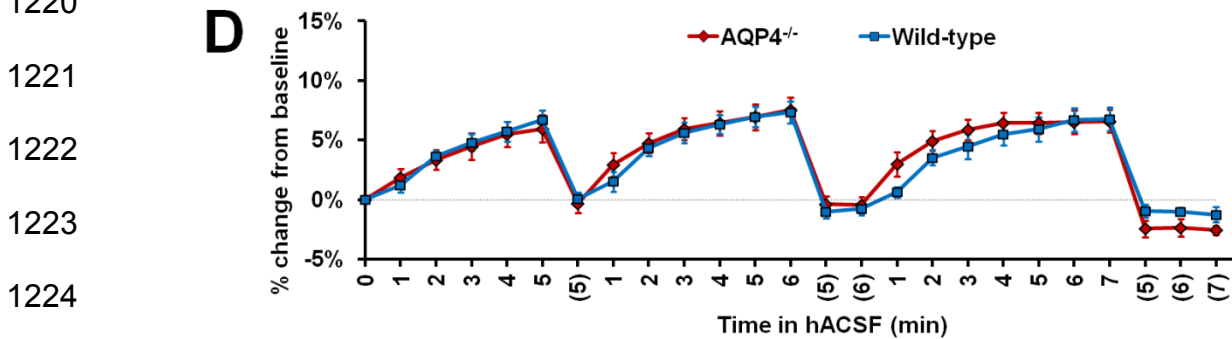

1225 **Figure 9: Astrocyte volume changes do not require expression of AQP4. (A)**  
1226 Representative thresholded images of an AQP4<sup>-/-</sup> astrocyte soma at baseline (A1),  
1227 overlaid with an image after 5 minutes in antagonist-free 40% hACSF (A2) and after 5  
1228 minute wash in standard ACSF (A3). As in previous figures, magenta regions (indicated  
1229 by white arrows) represent increases in volume over baseline. **(B)** Astrocyte volume,  
1230 quantified as percent change from baseline, in AQP4<sup>-/-</sup> and wild-type astrocytes  
1231 exposed to 17% or 40% hACSF. AQP4<sup>-/-</sup> astrocytes showed no change in swelling at  
1232 17% hACSF and significantly greater swelling at 40% hACSF, as compared to wild-  
1233 type. **(C)** Representative thresholded images and overlays of an AQP4<sup>-/-</sup> neuron soma  
1234 at baseline (C1), after 5 minutes in antagonist-free 40% hACSF (C2), and after a 5  
1235 minute wash period in standard ACSF (C3). **(D)** Volume changes in hACSF are  
1236 compared between AQP4<sup>-/-</sup> and wild-type neurons. As expected, neuronal swelling did  
1237 not differ significantly between these two genotypes. \*p < 0.05, \*\*p < 0.01, and \*\*\*p <  
1238 0.001 versus wild-type astrocytes in 40% hACSF. Scale bars, 5 μm each for (A) and  
1239 (C).
